# Supplementary material for: Long range signature of liquid's inertia in nanoscale drainage flows
Source: Royal Society of Chemistry journal article supplement (doi:10.1039/d4sm01006j), 2024-01-01

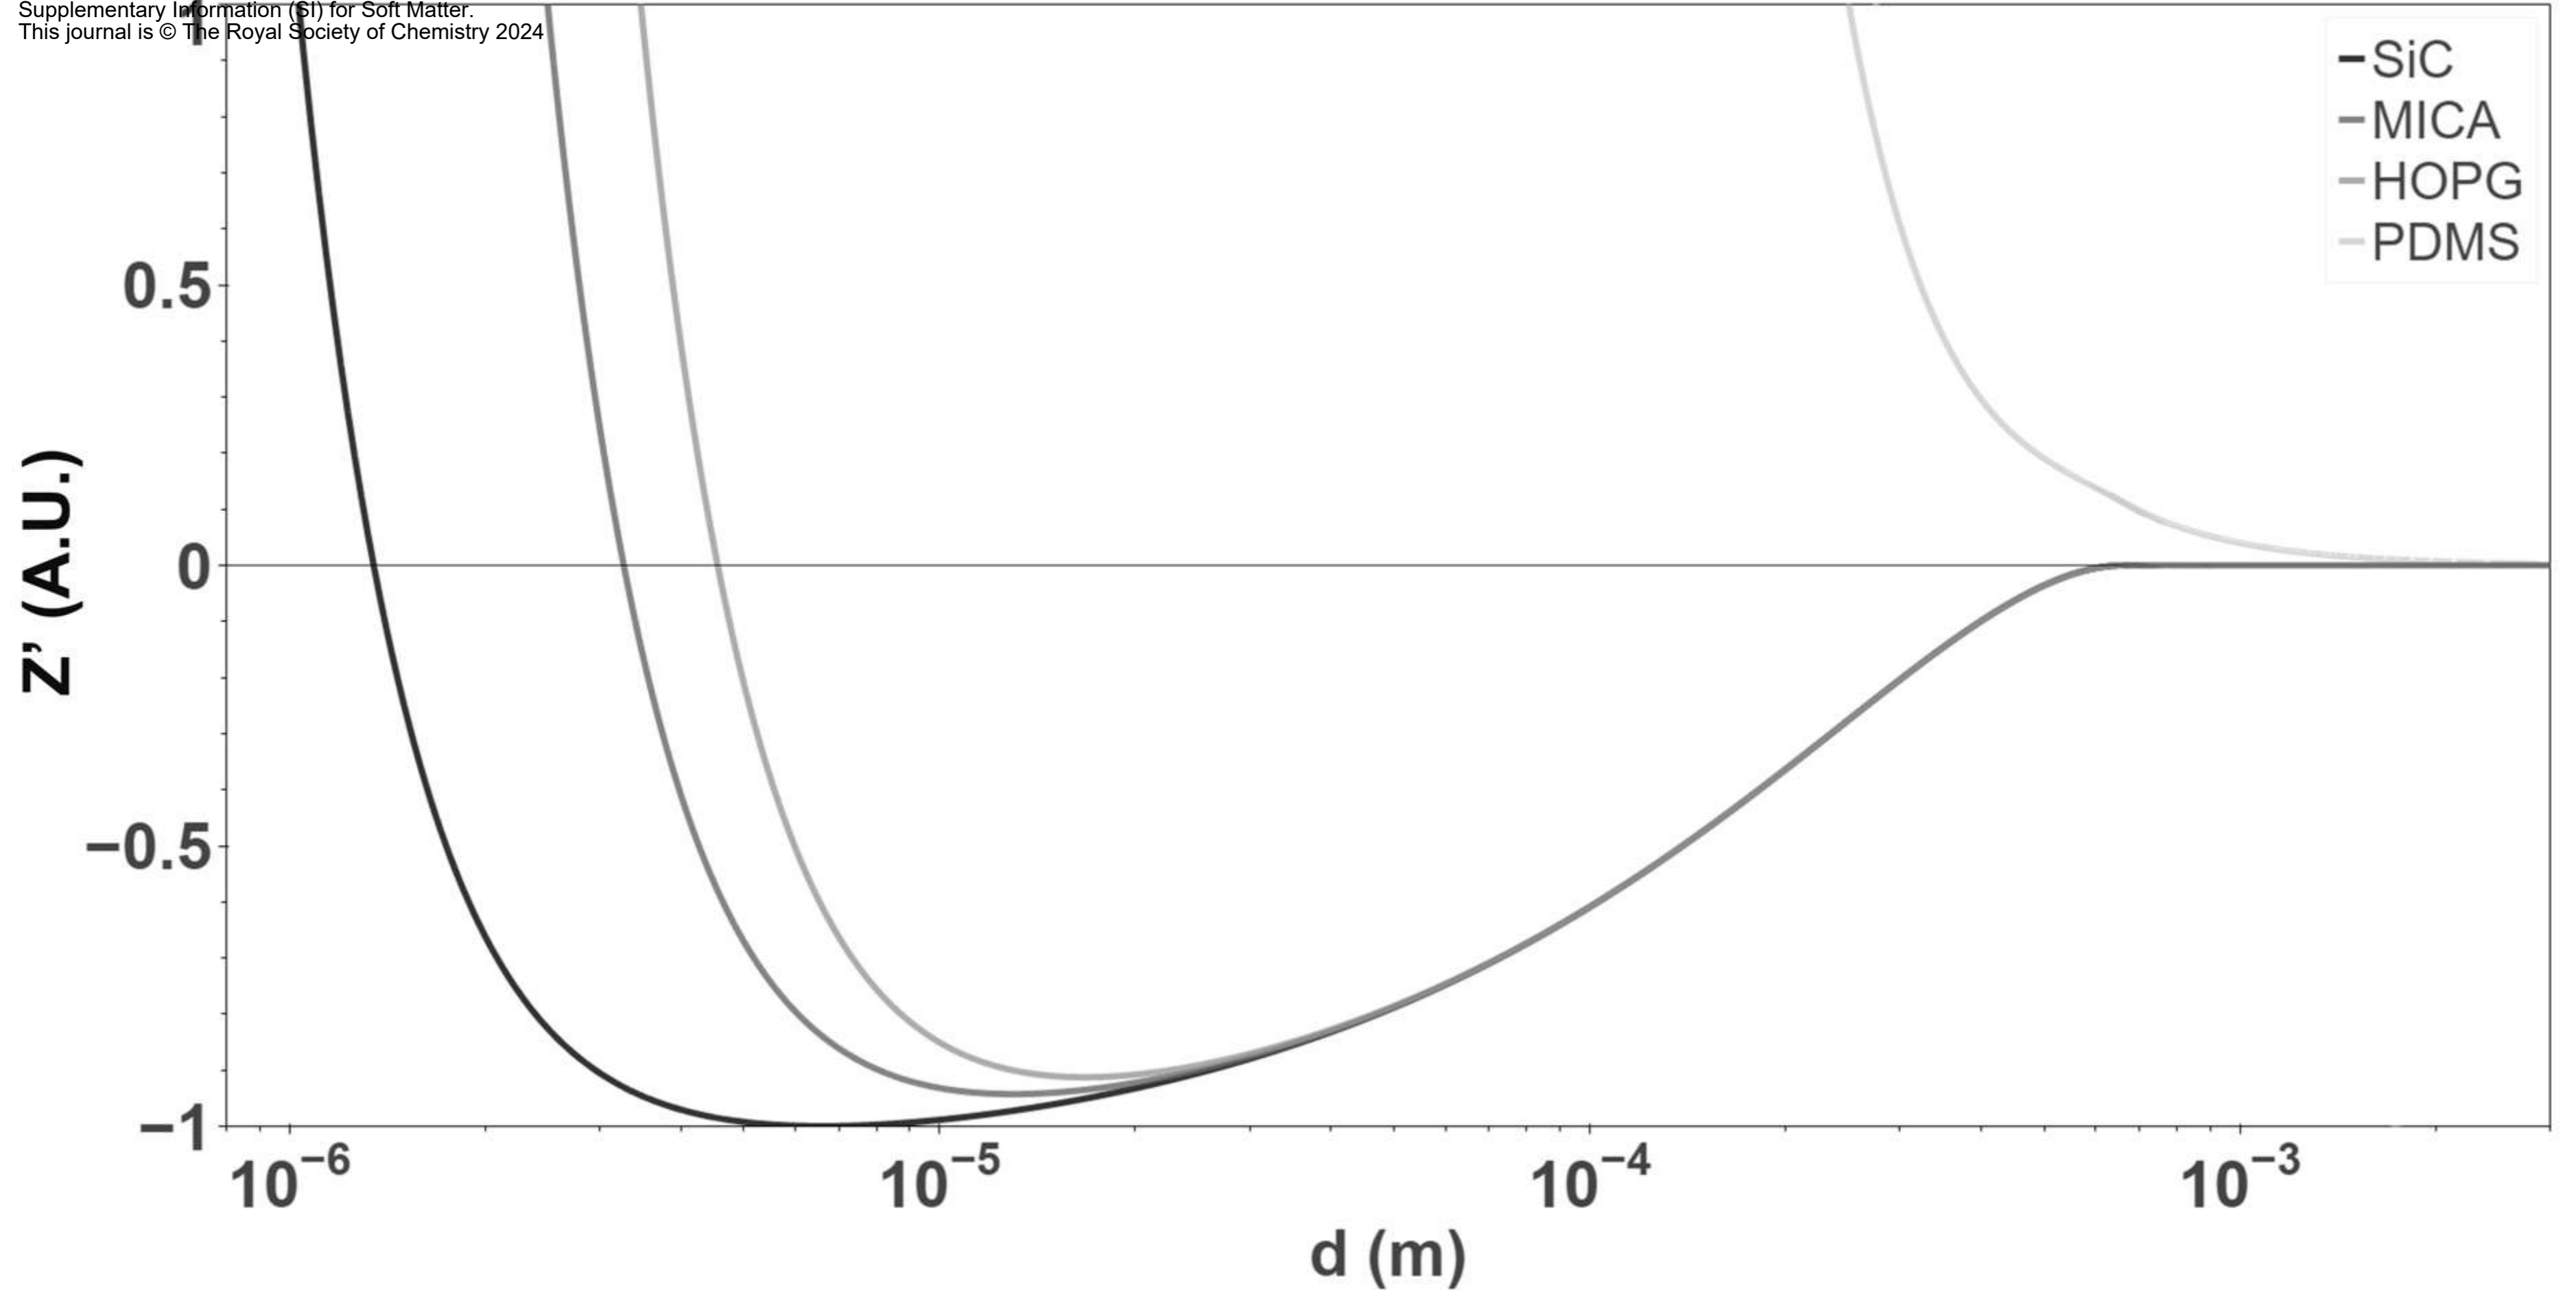

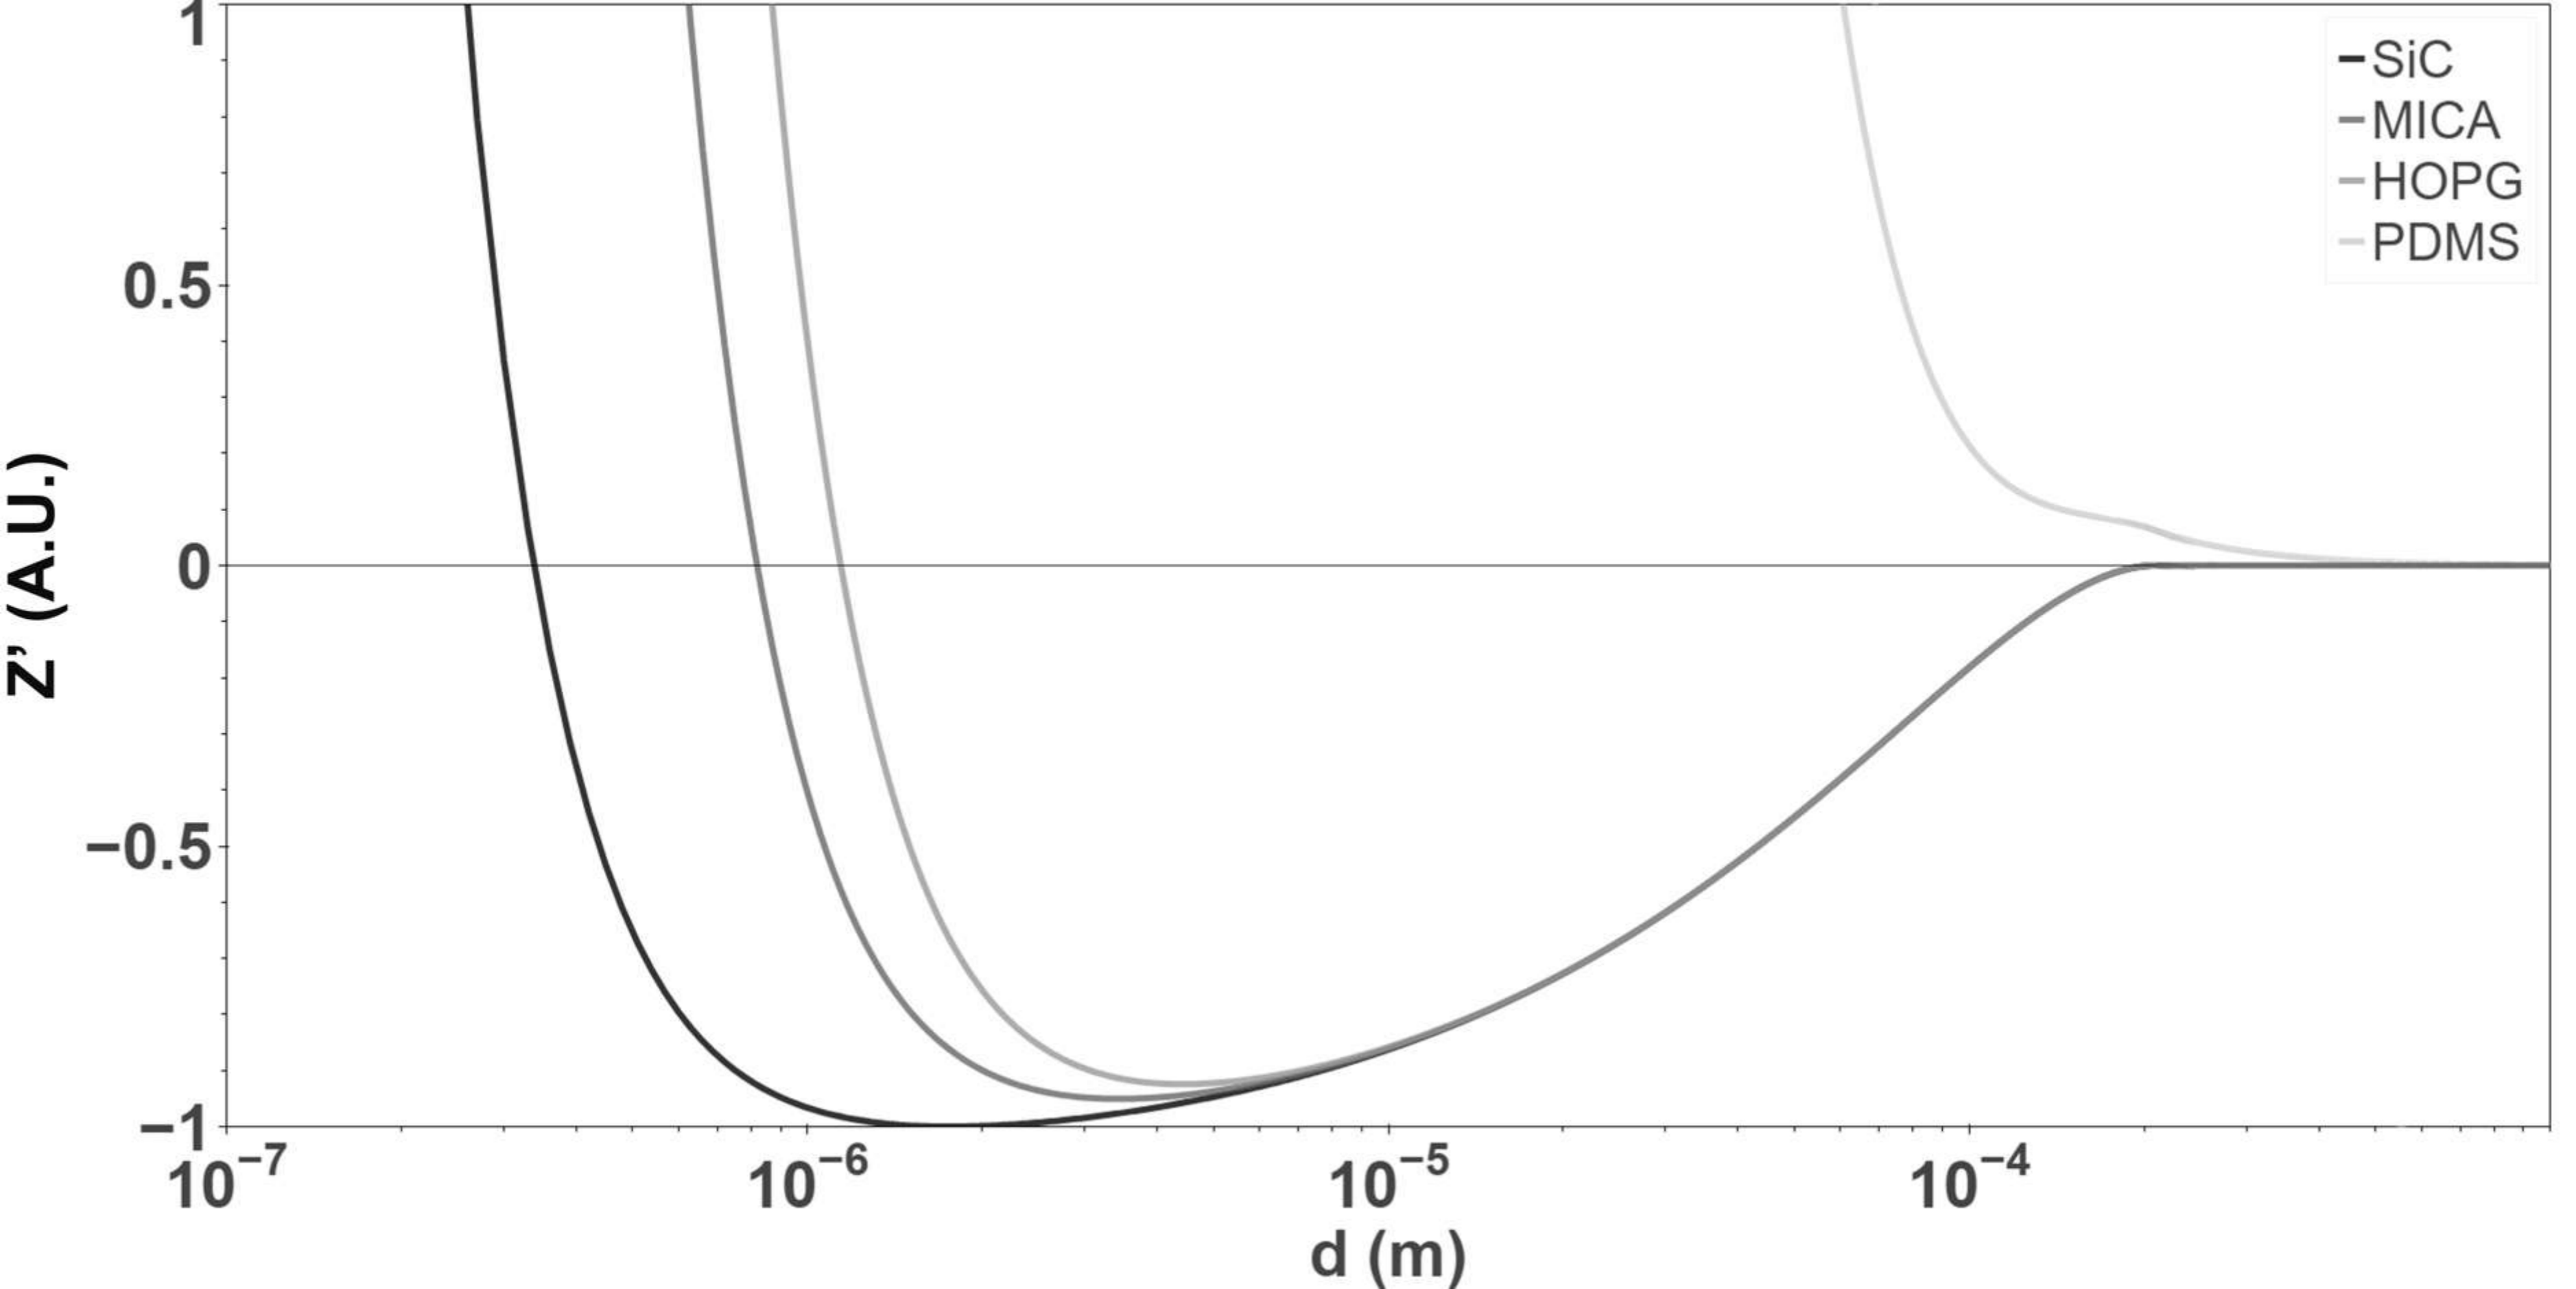

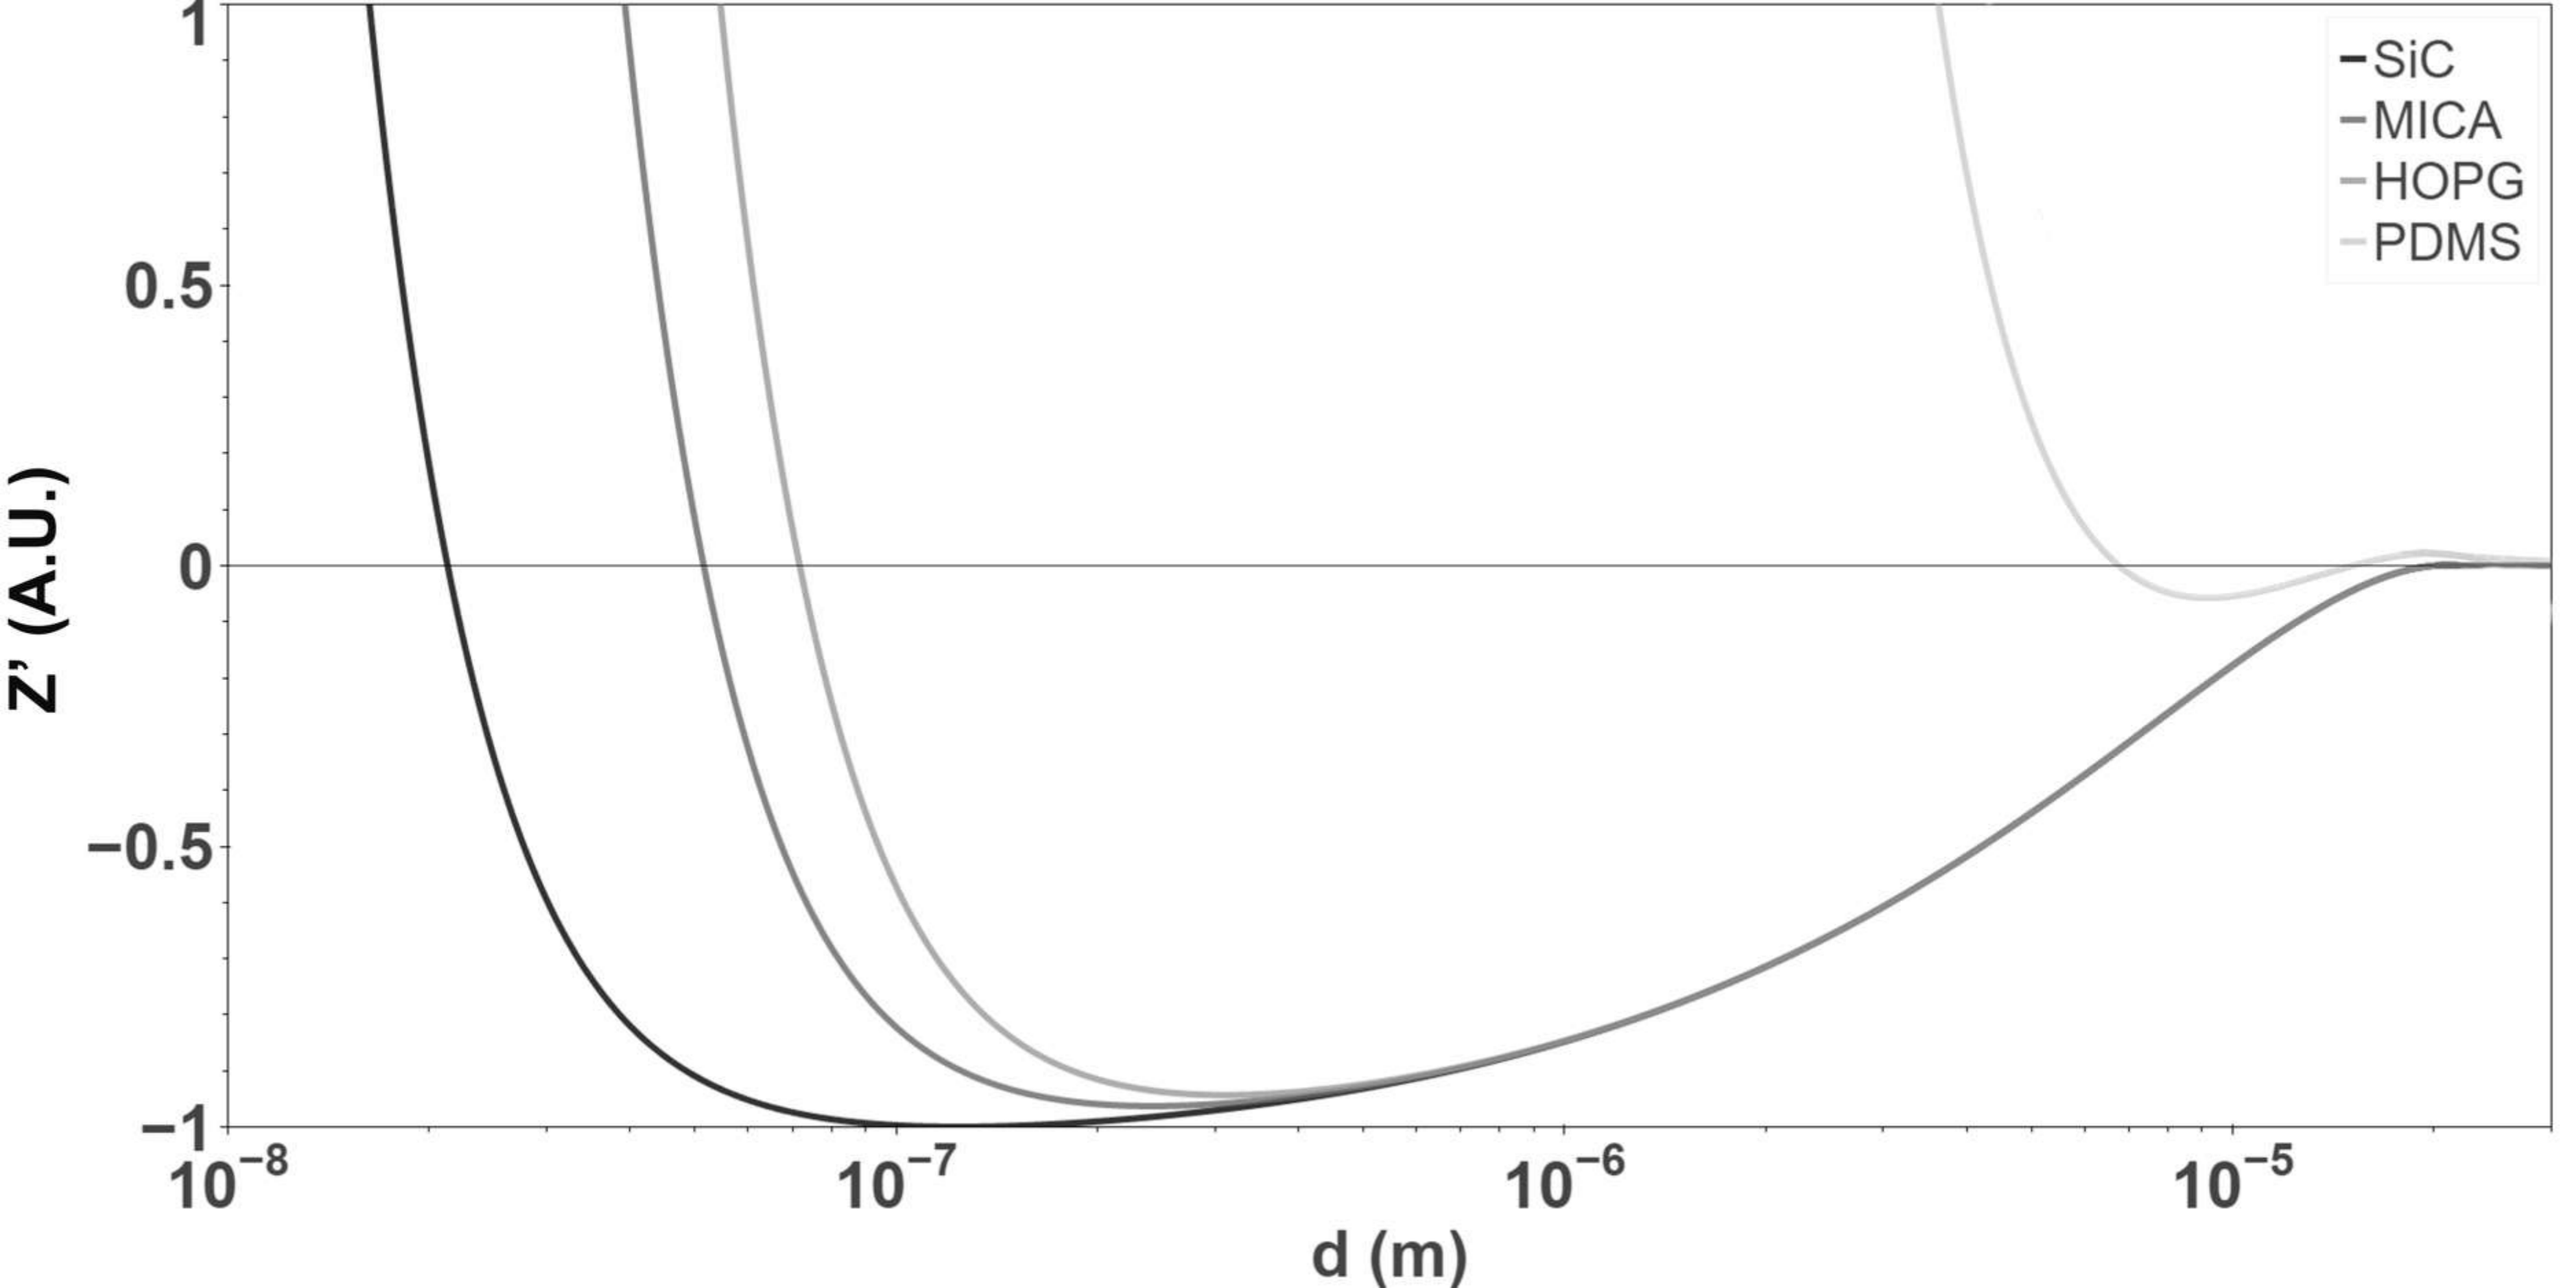

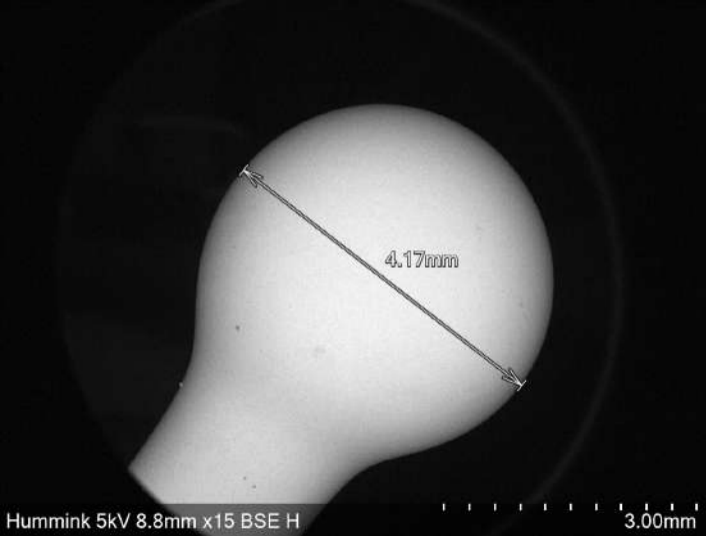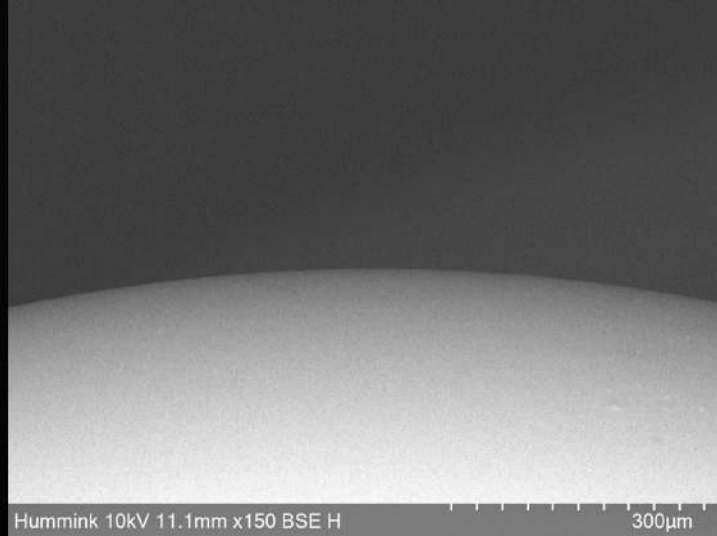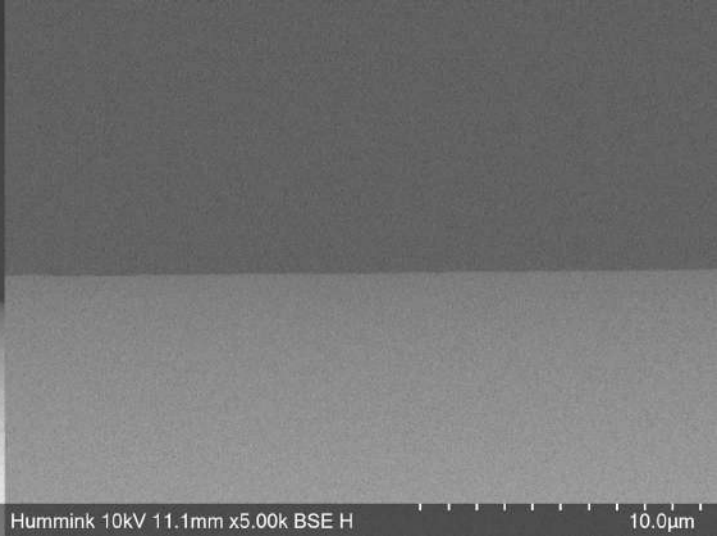

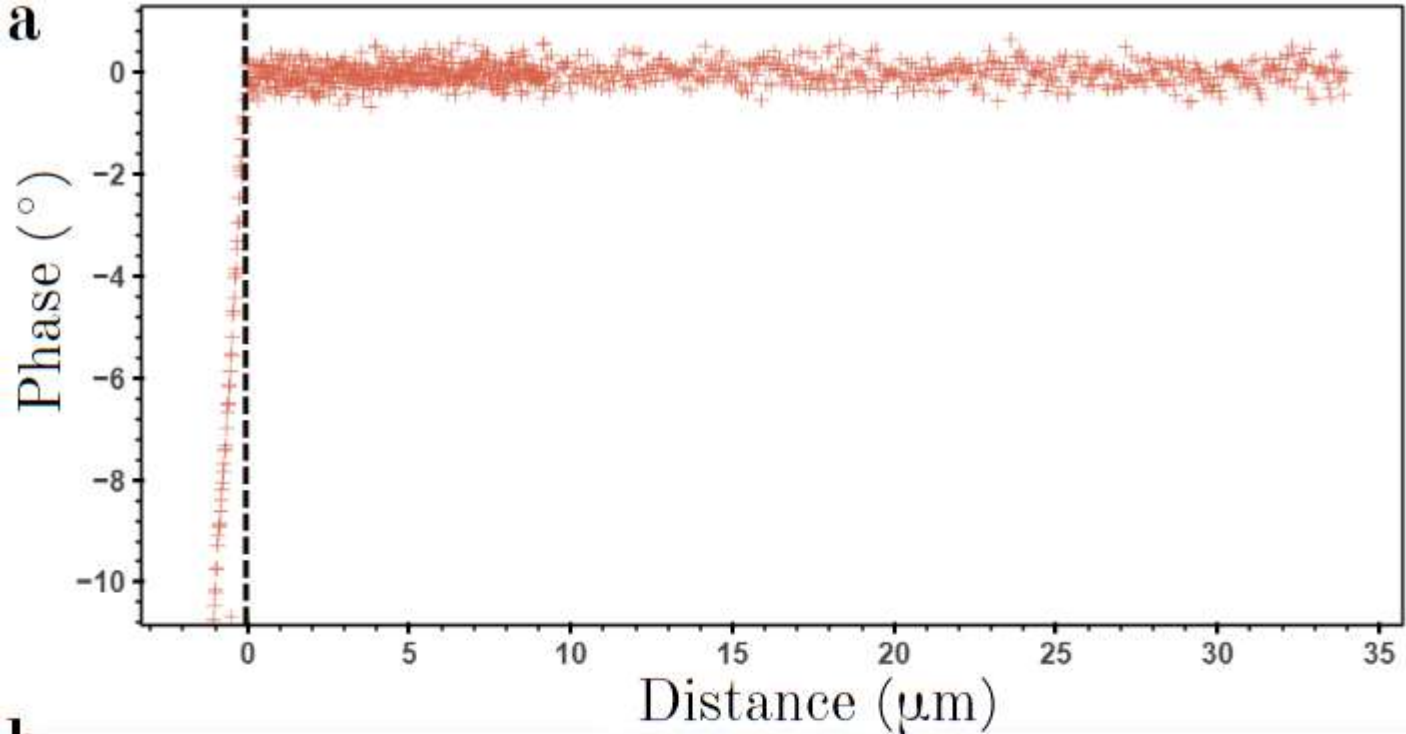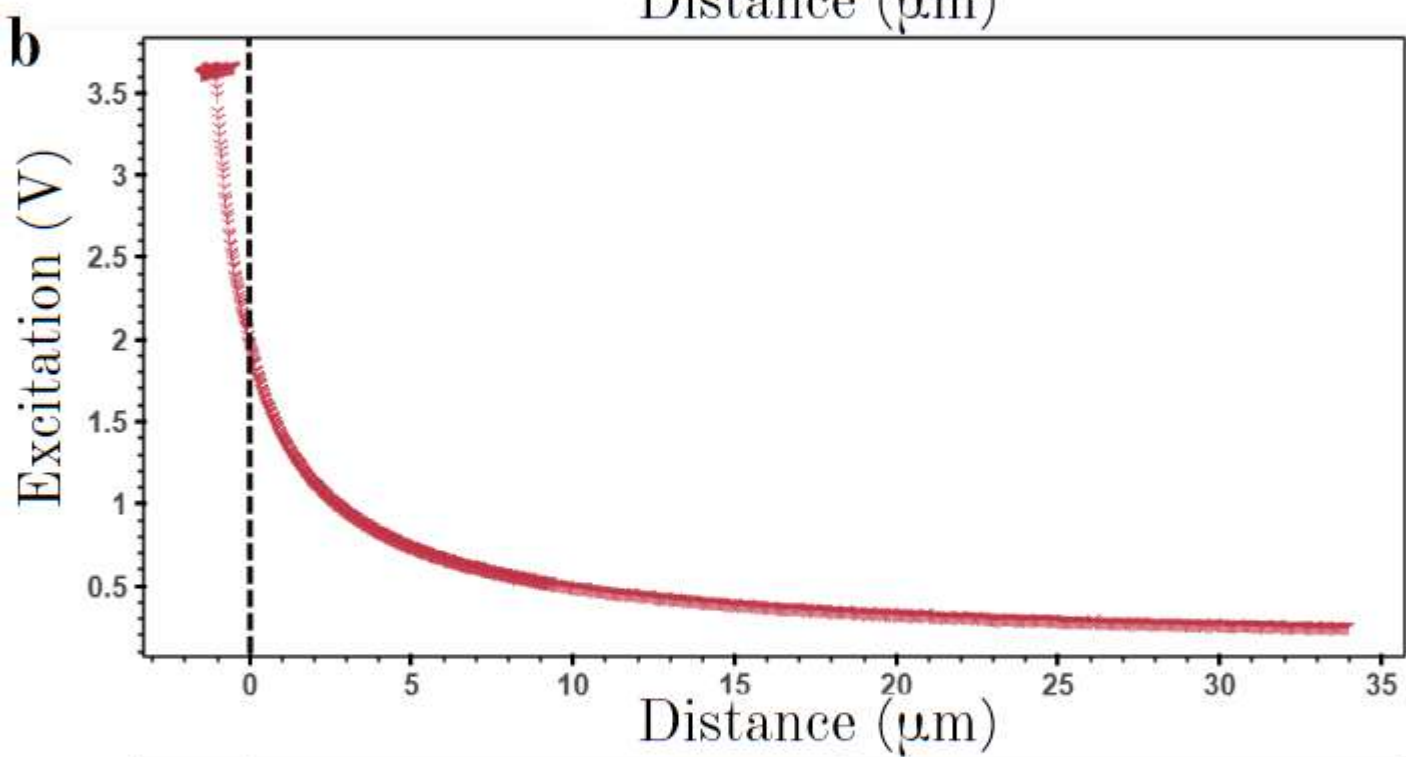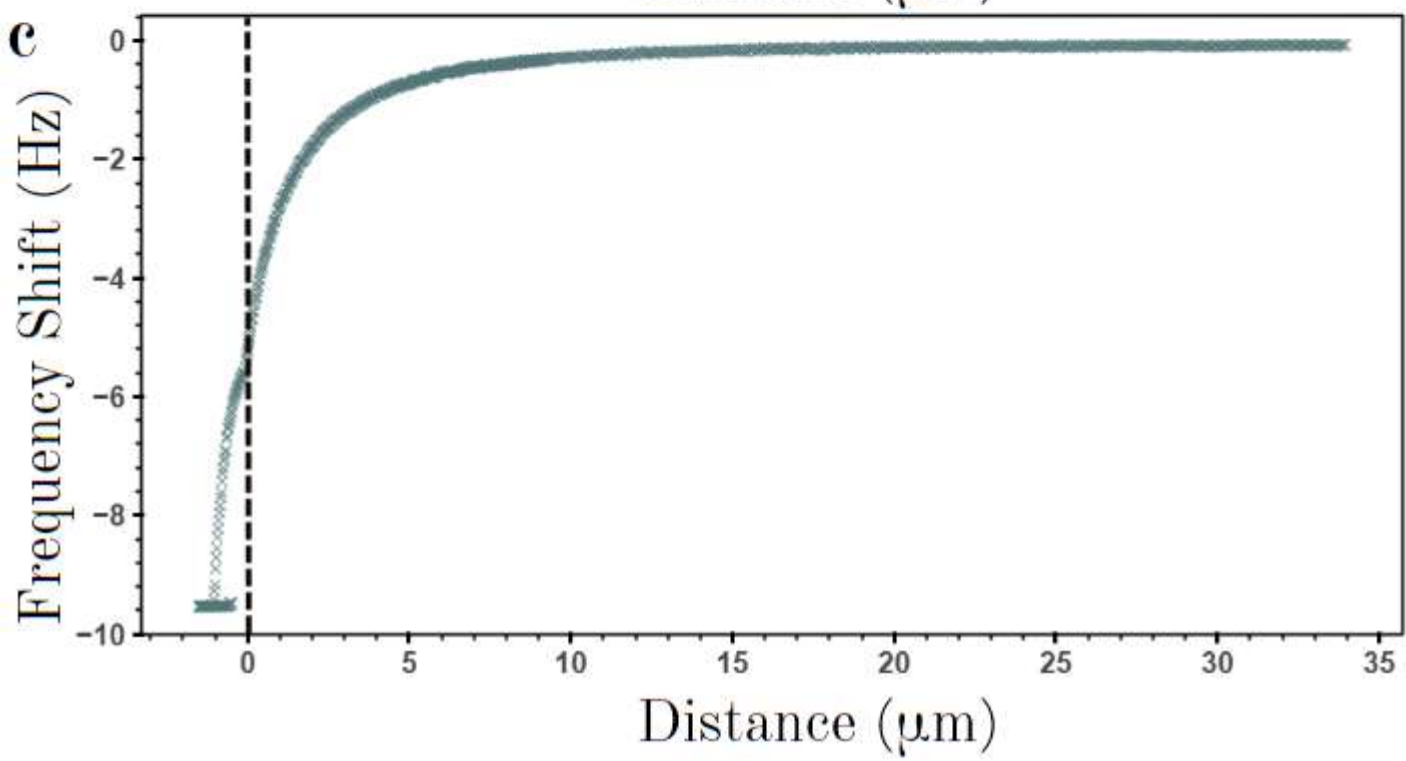

# Mica

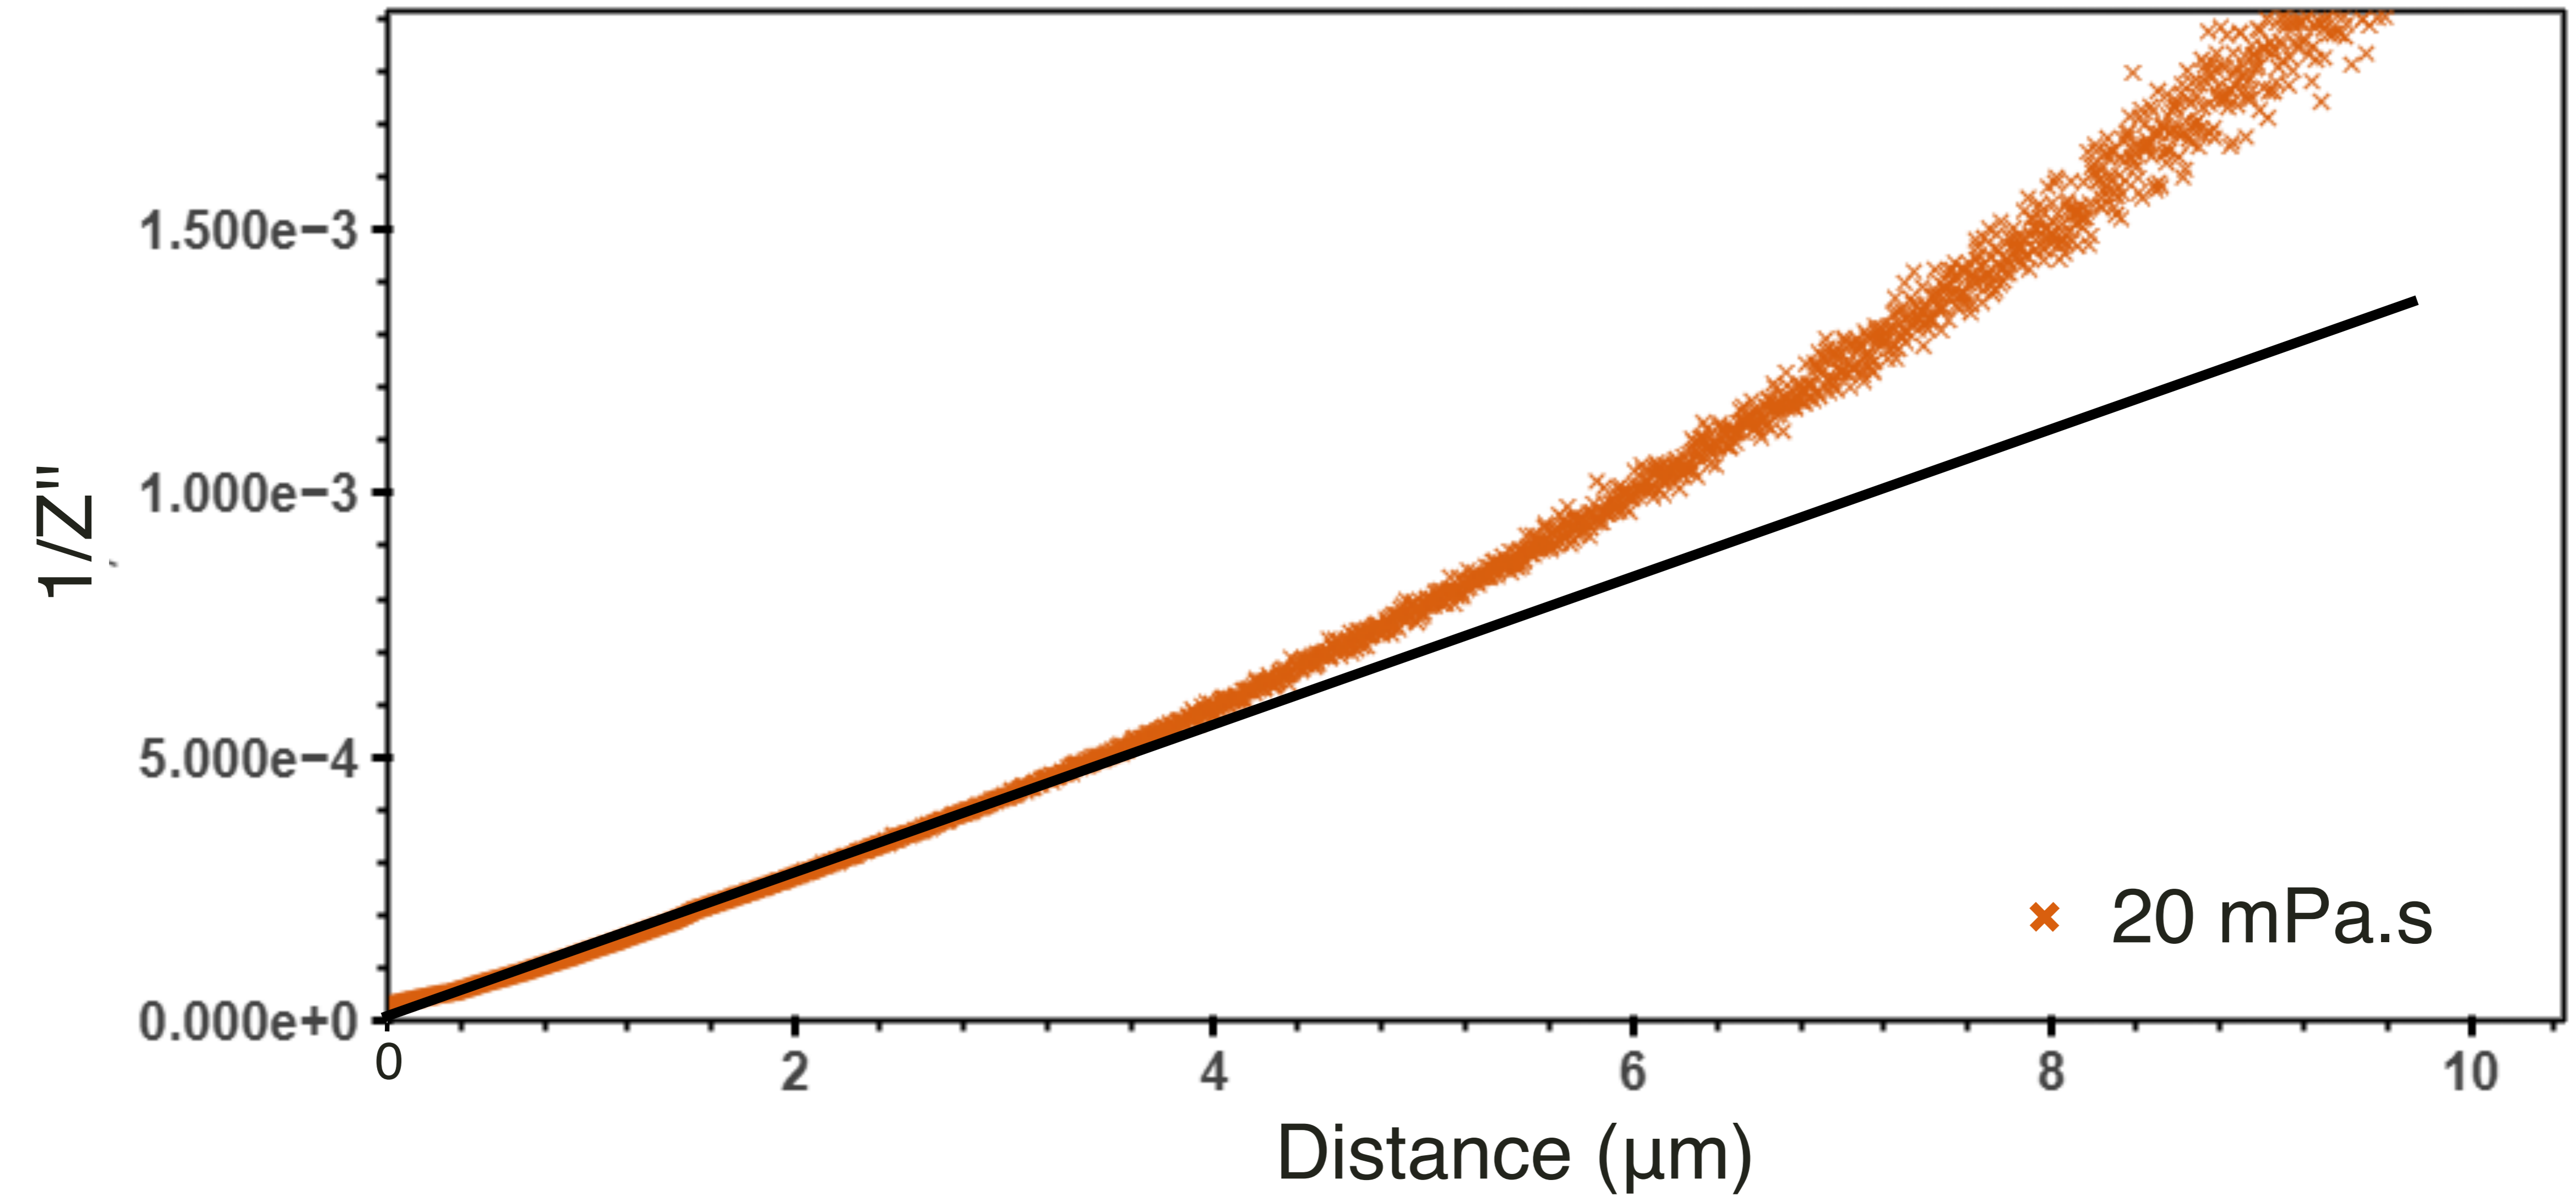

SiC

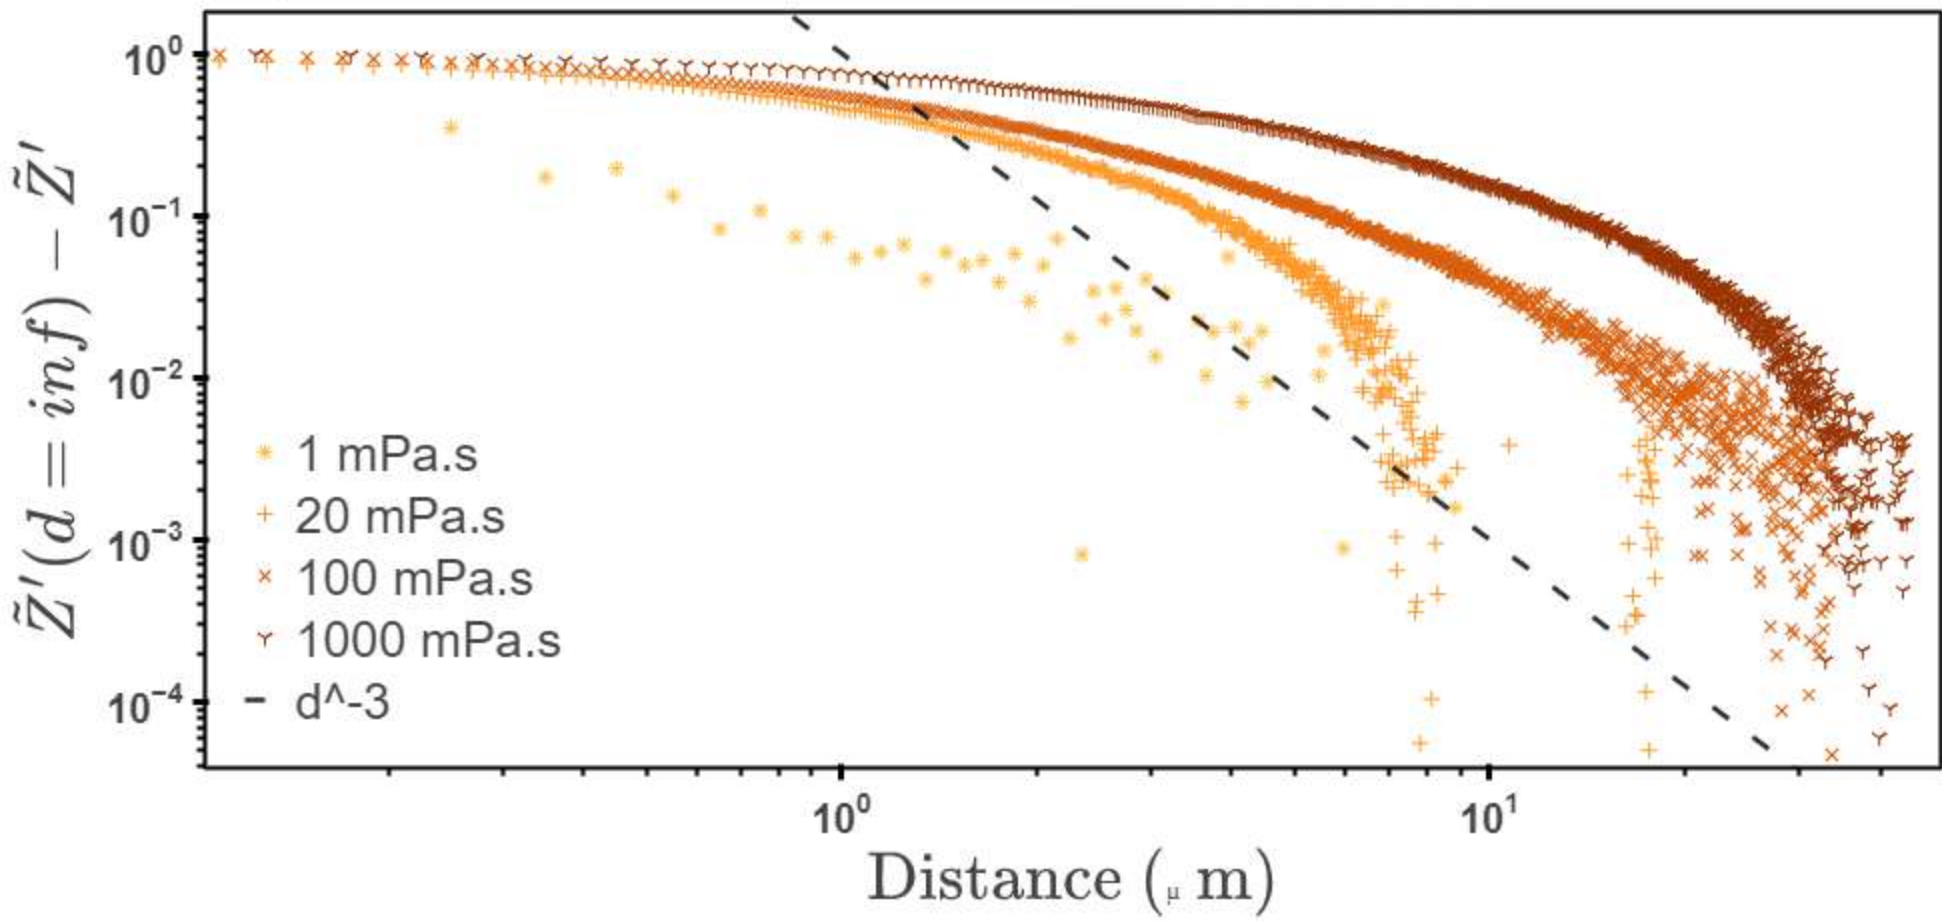

SiC

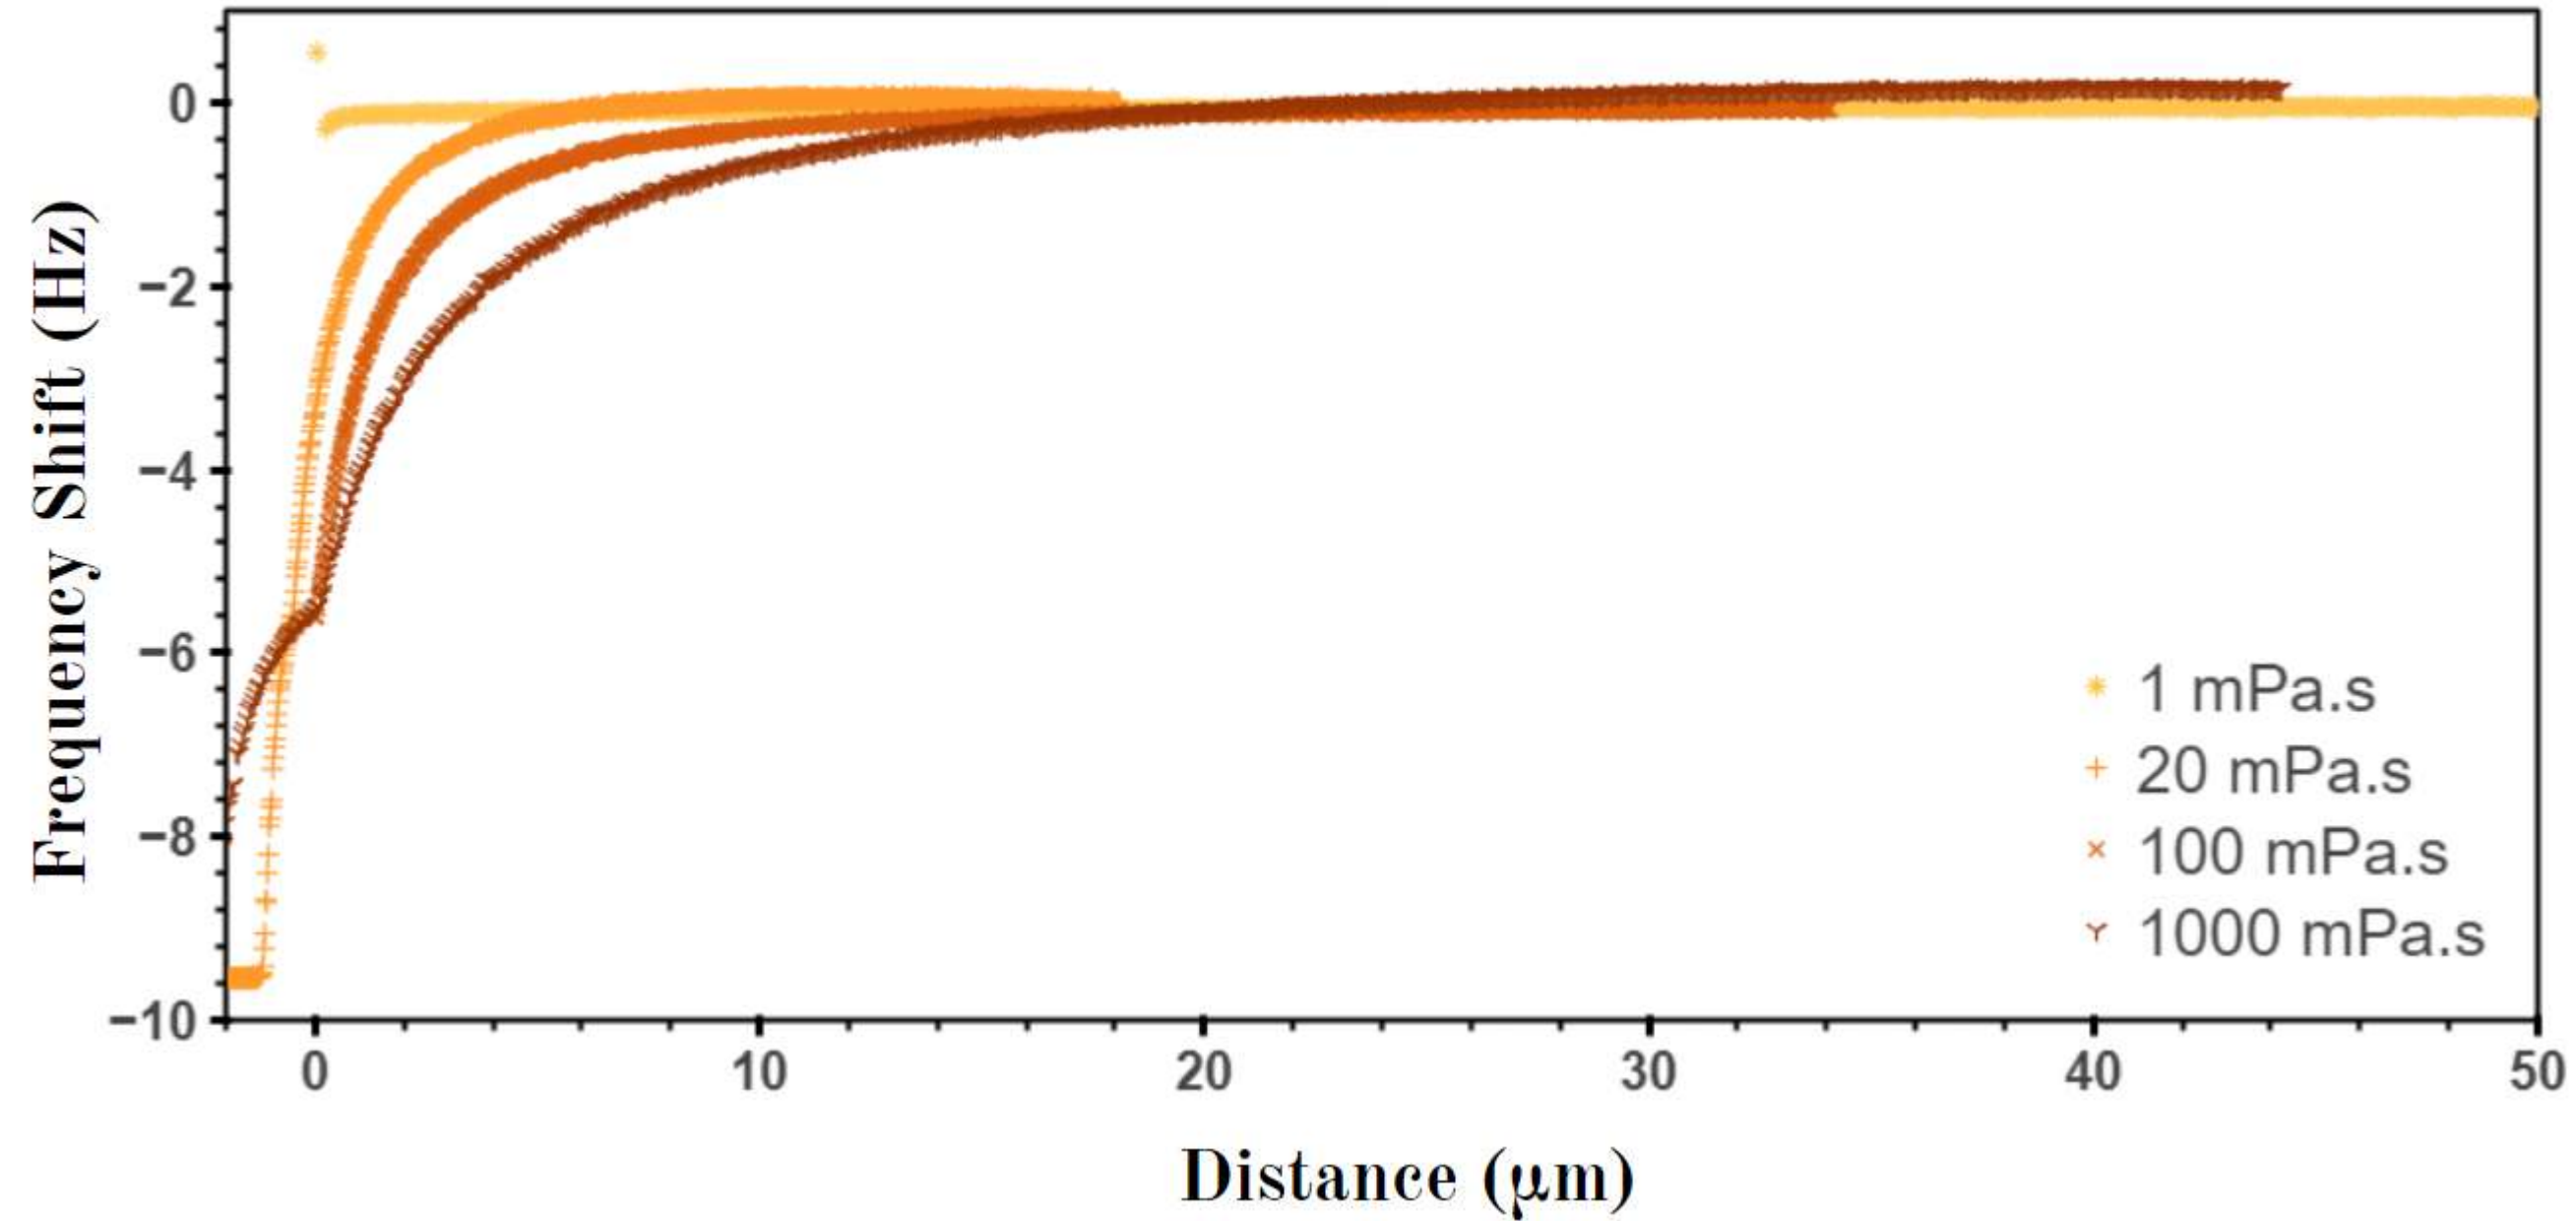



# Mica

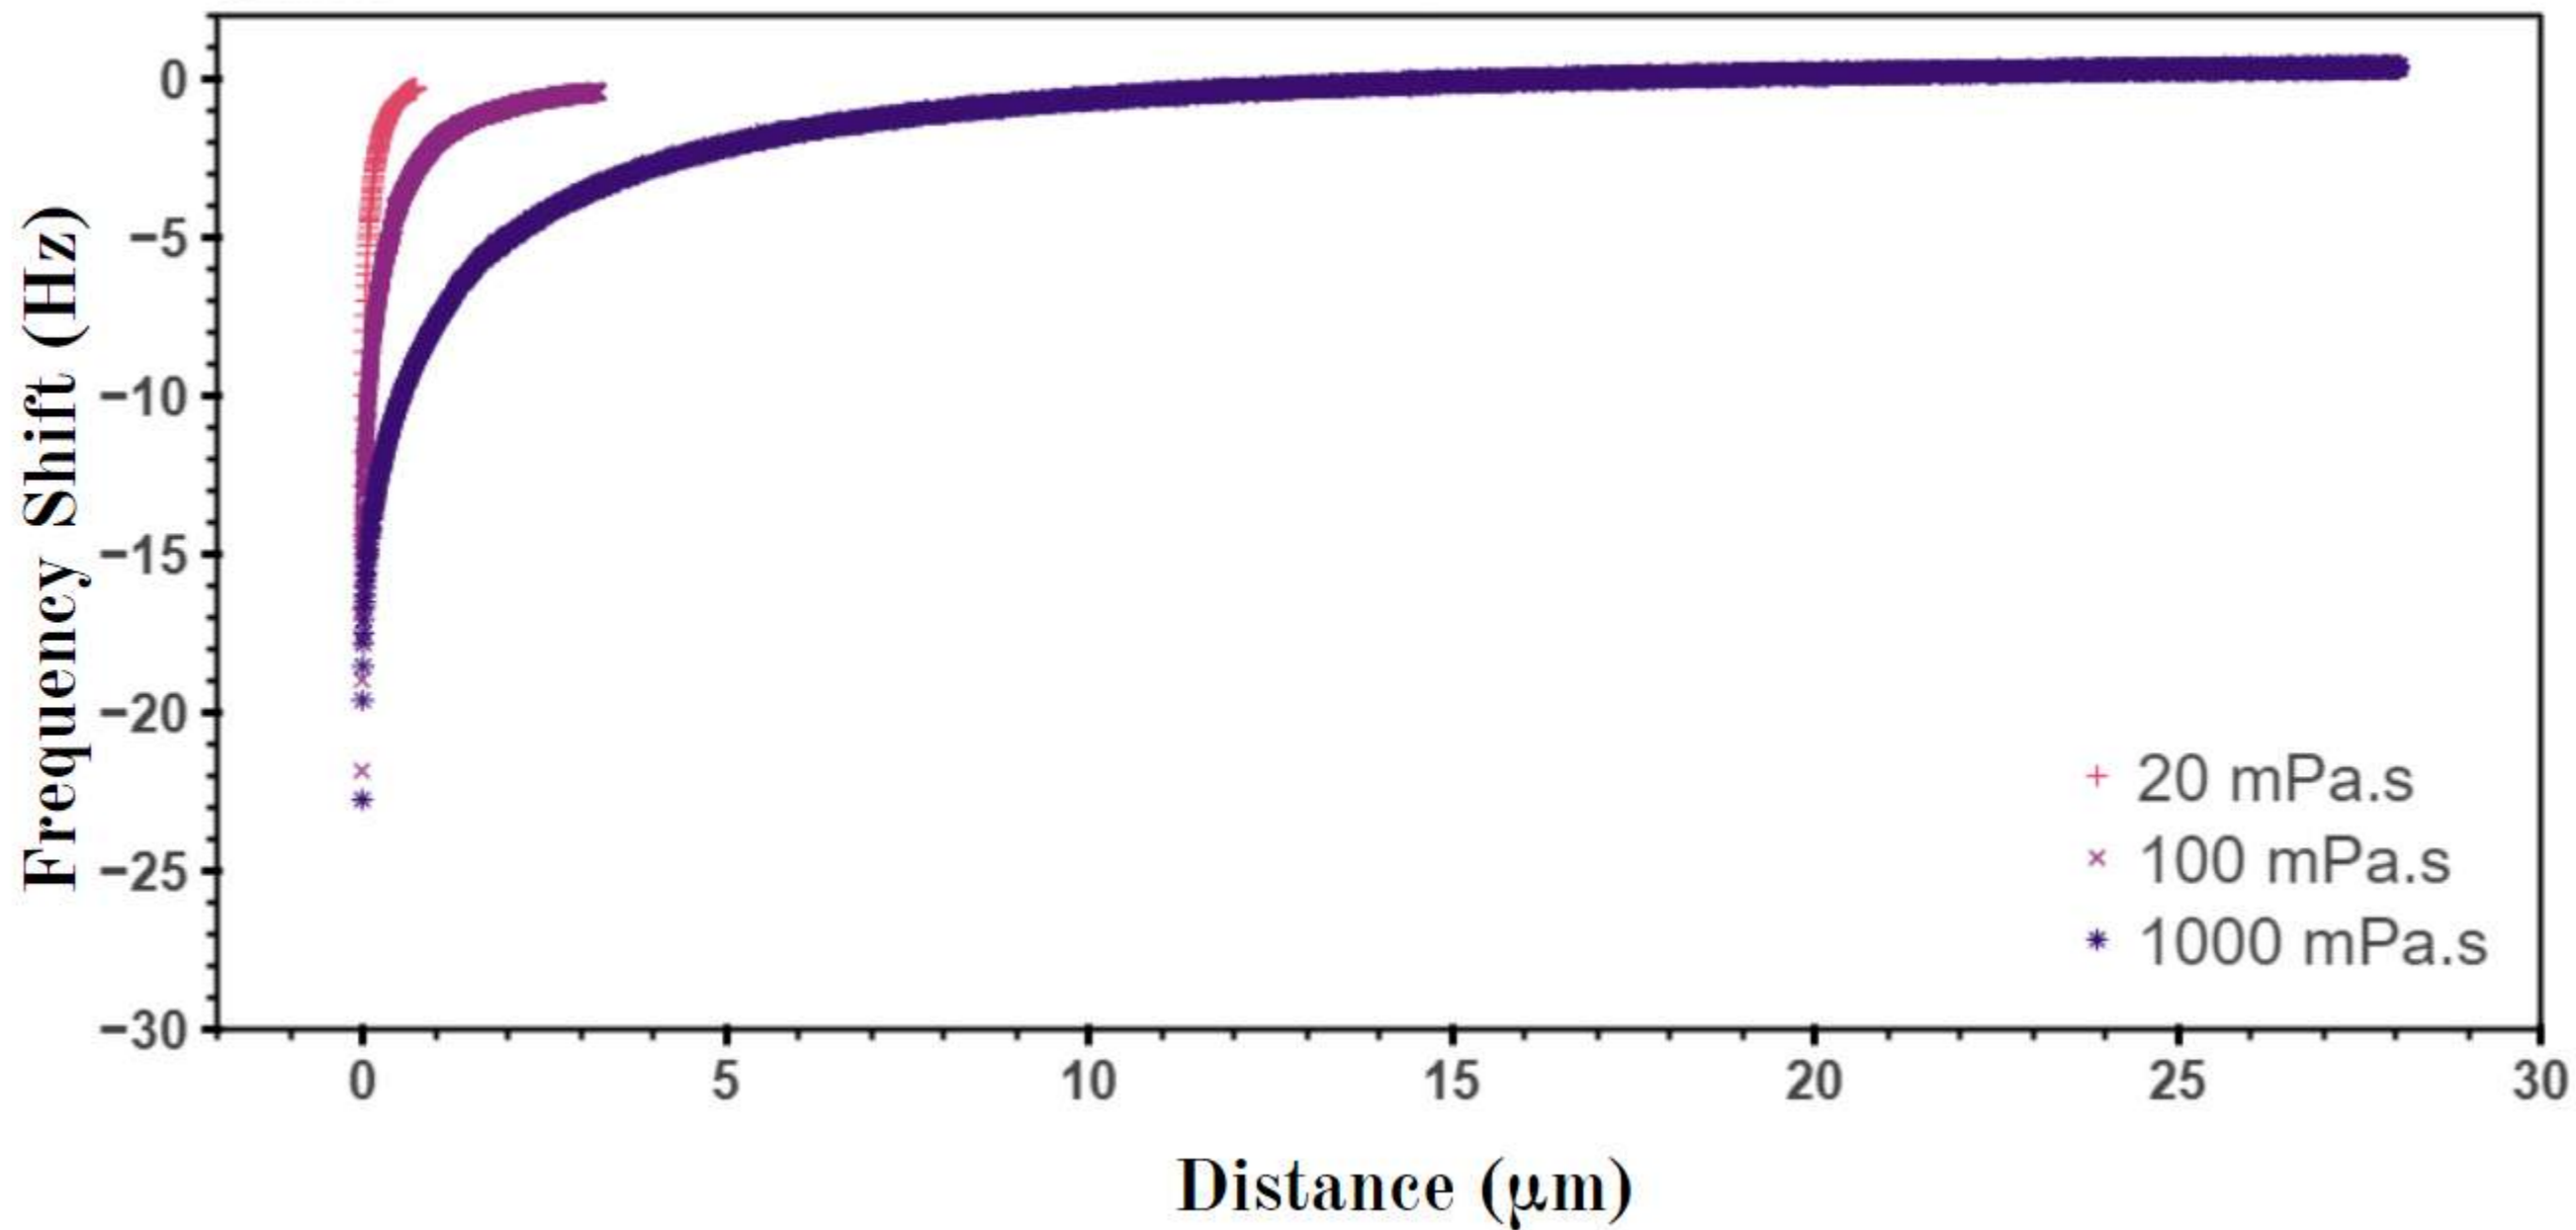

# HOPG

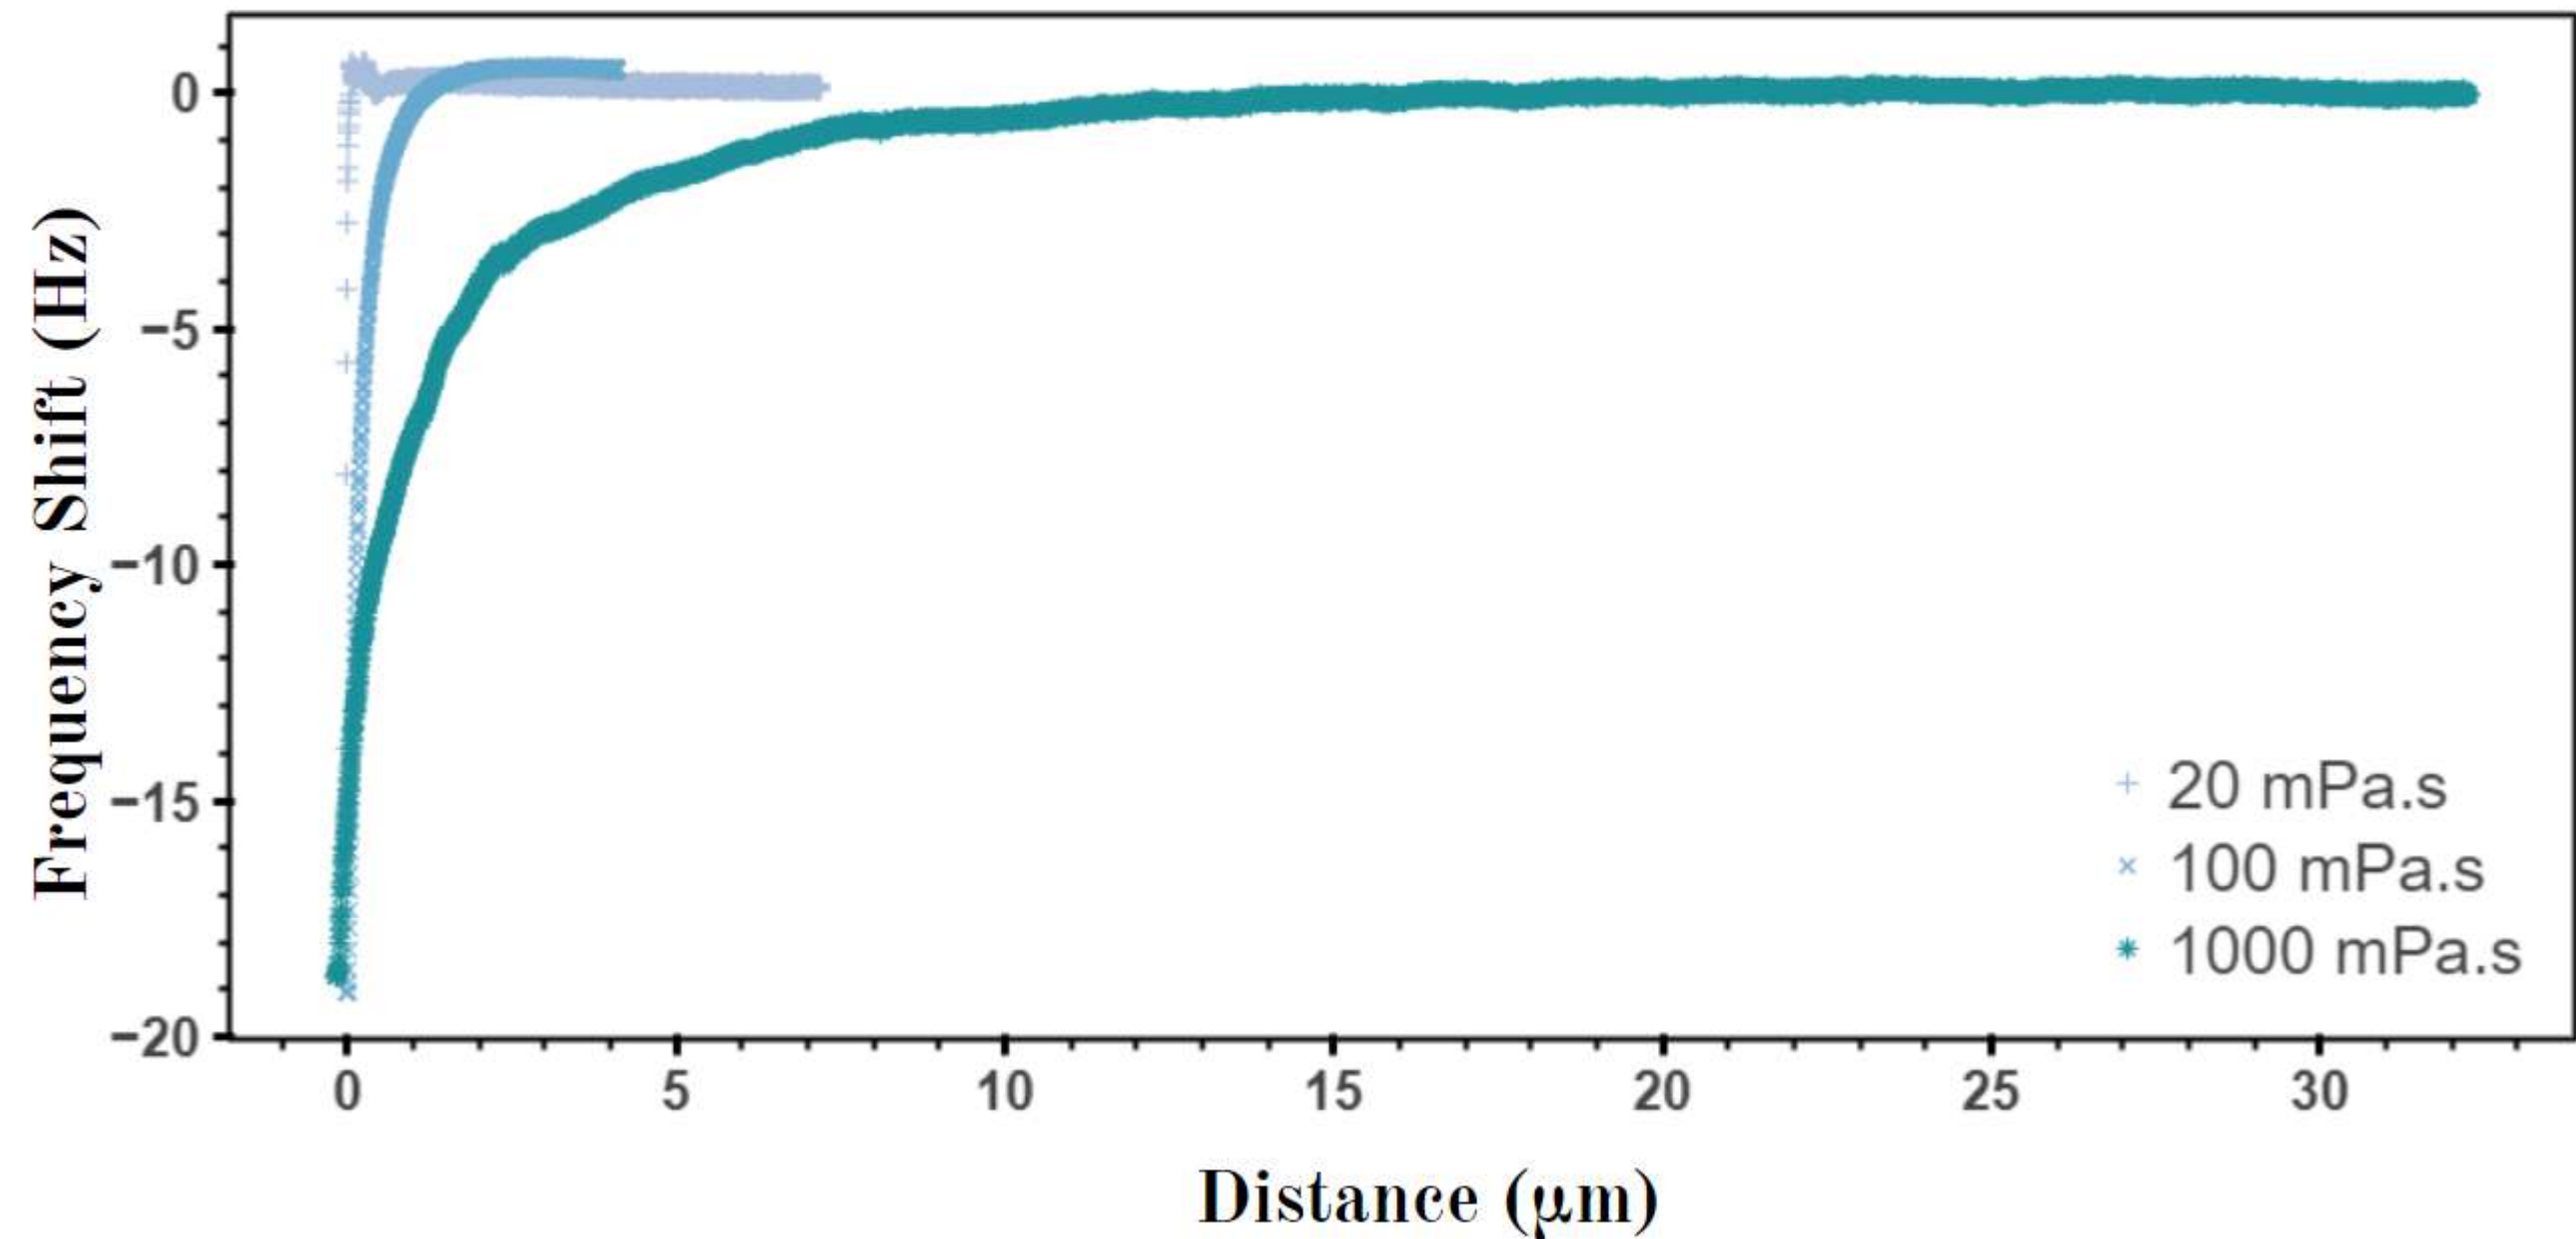

dioctylphthalate on PDMS glass sphere

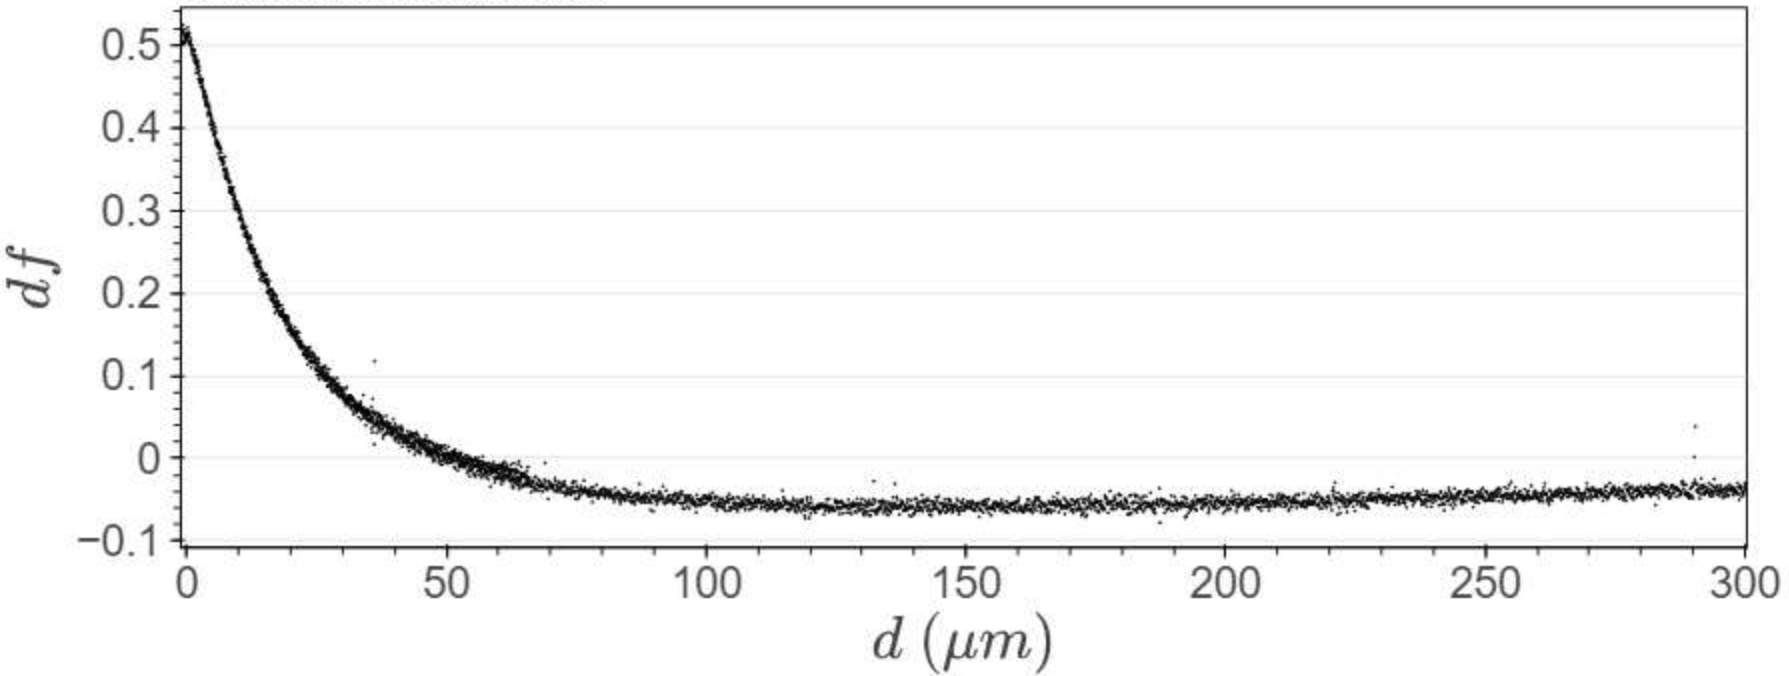

dioctylphthalate on PDMS glass sphere

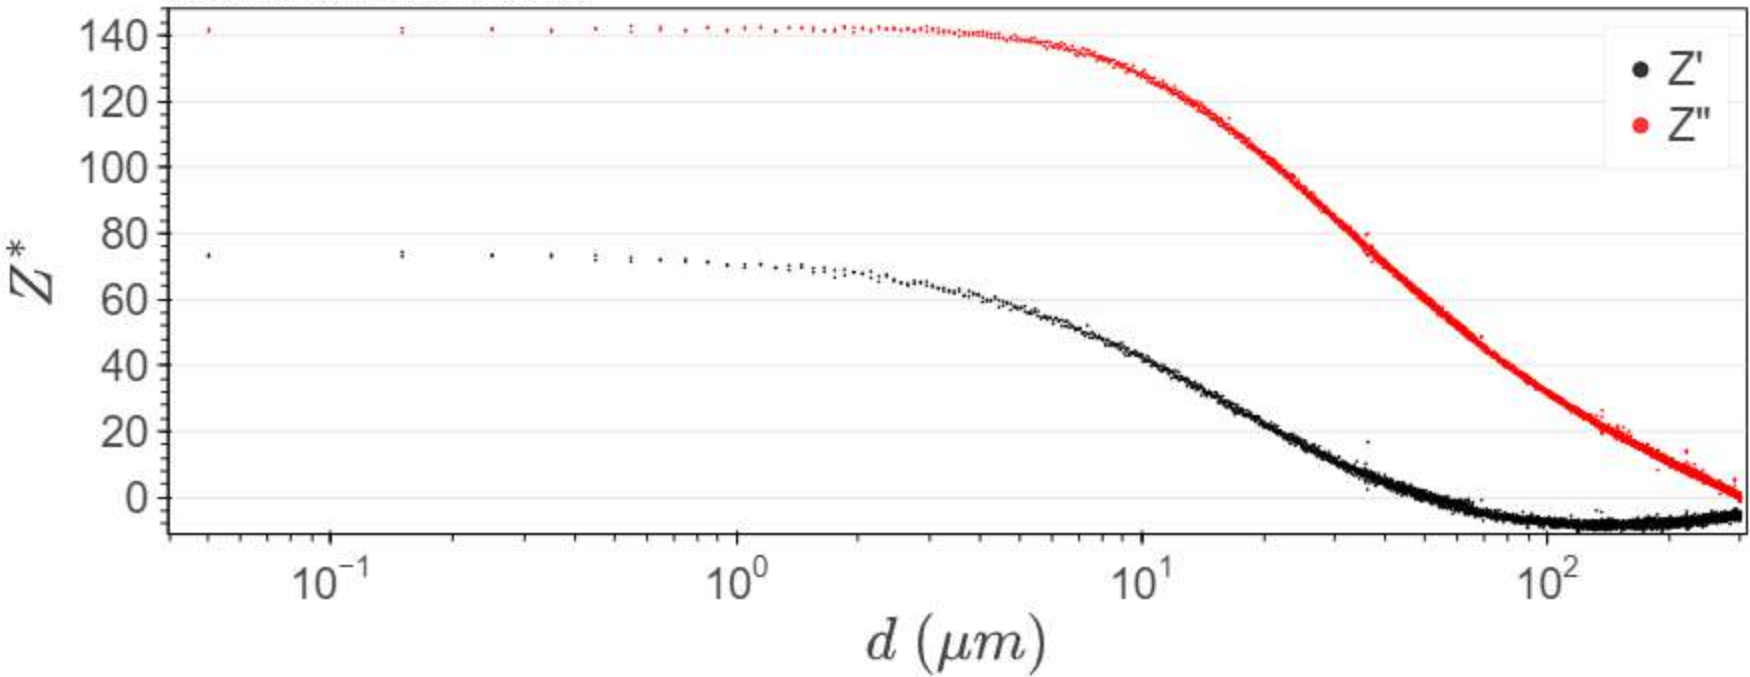

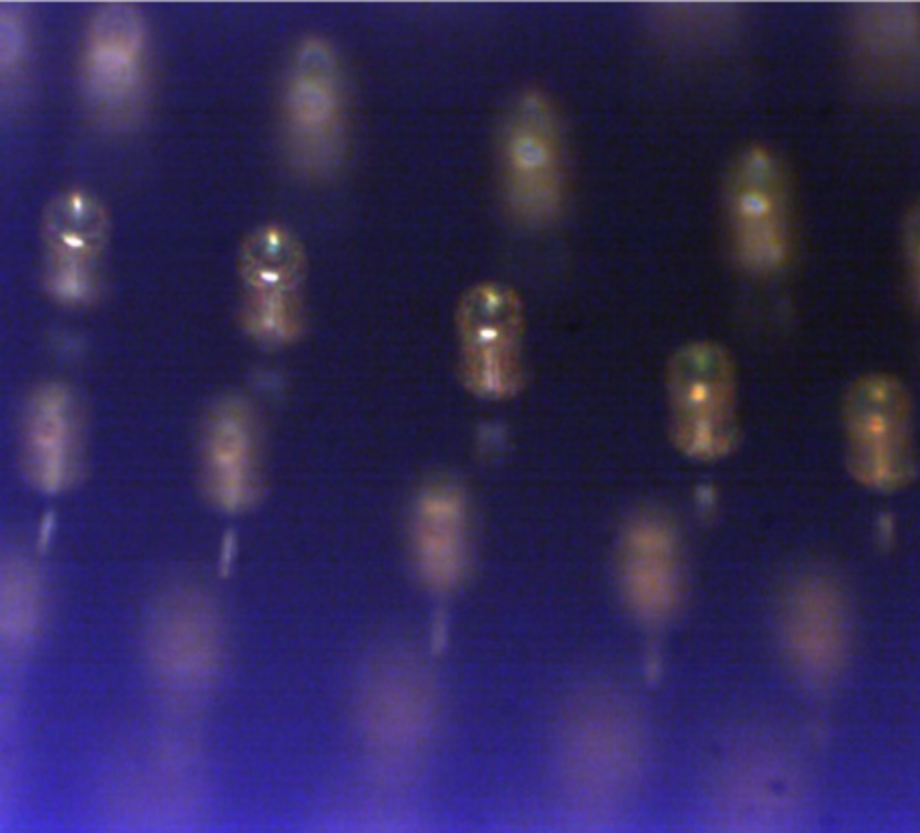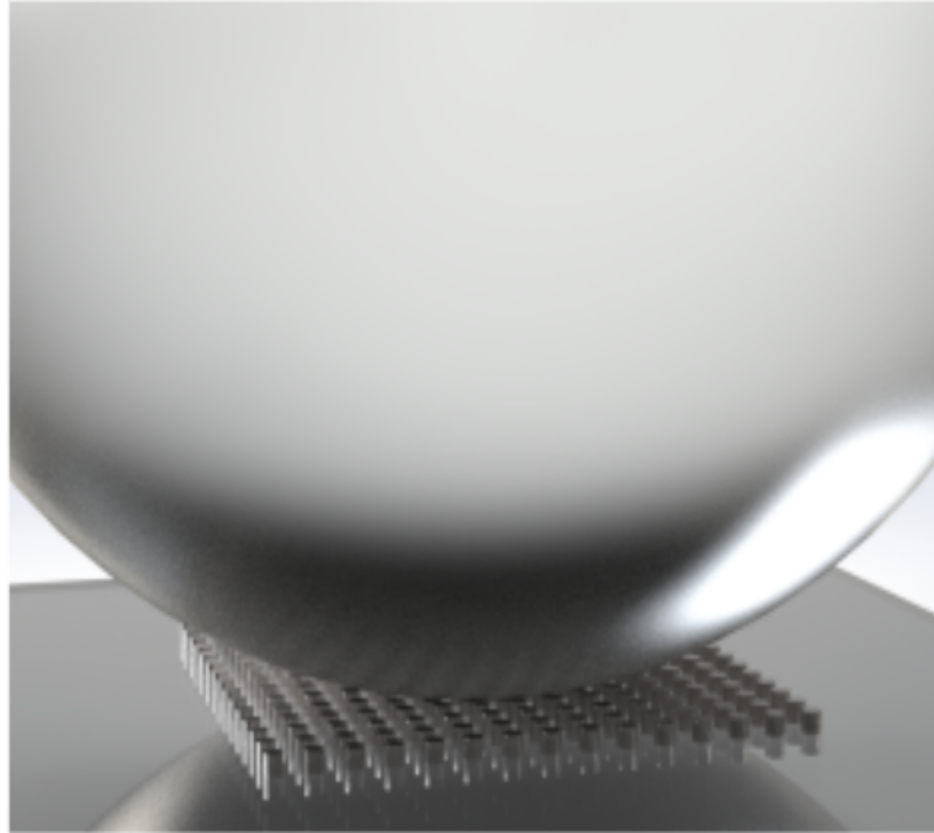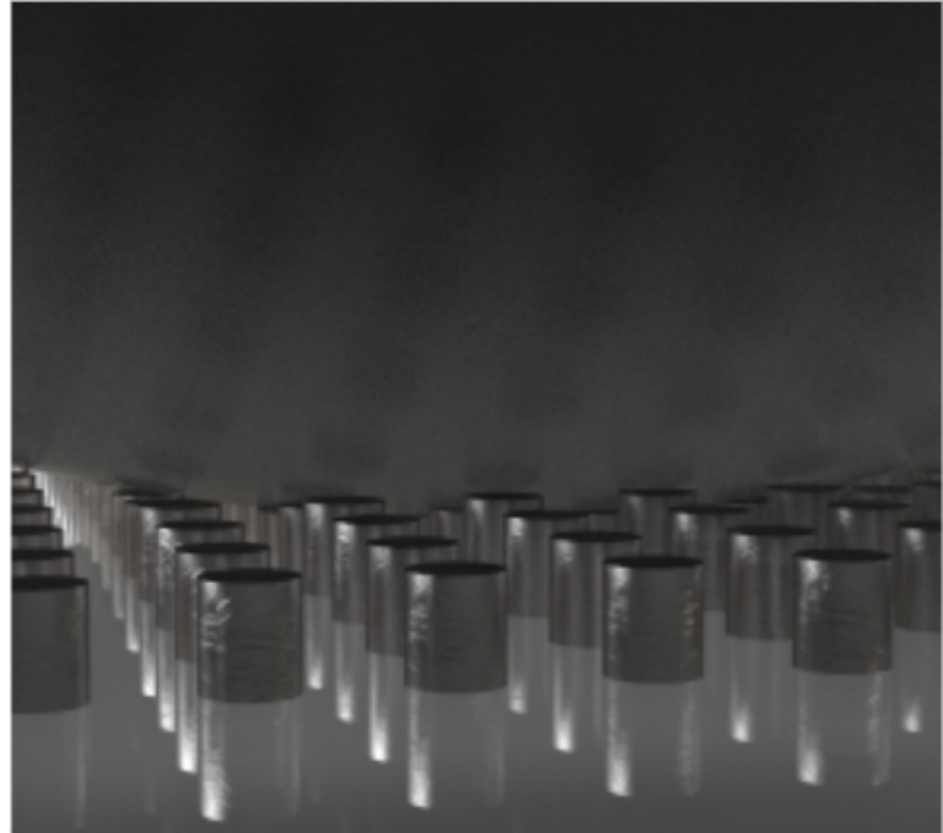

**a**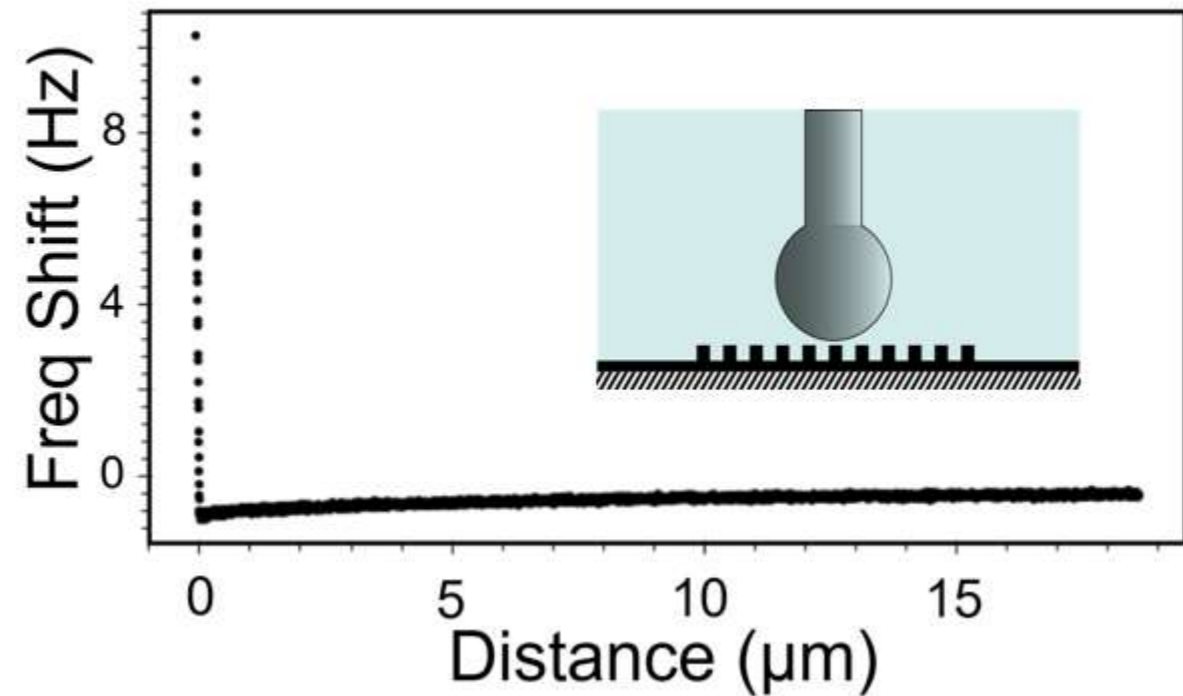**b**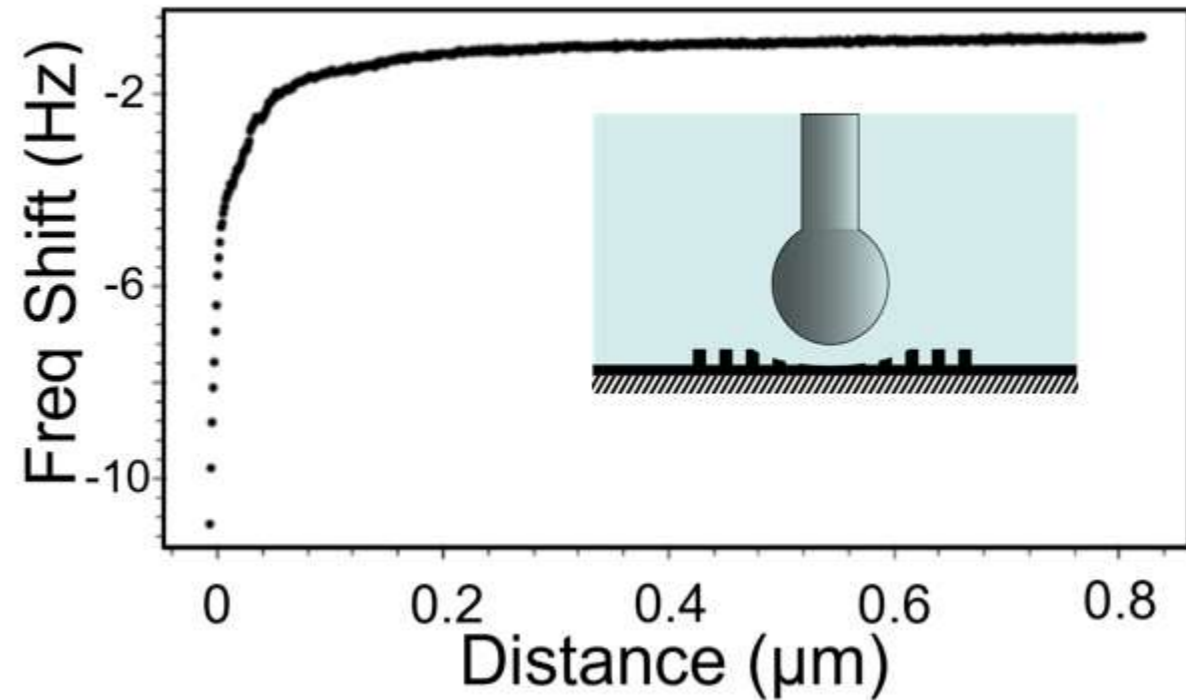**c**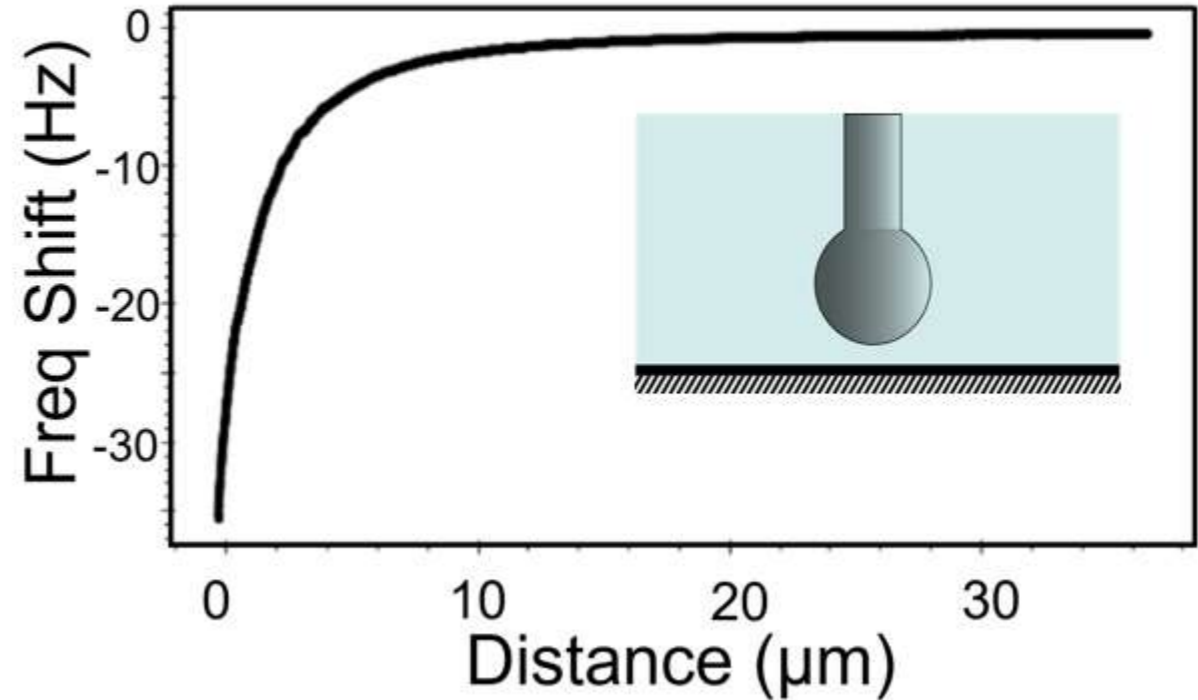

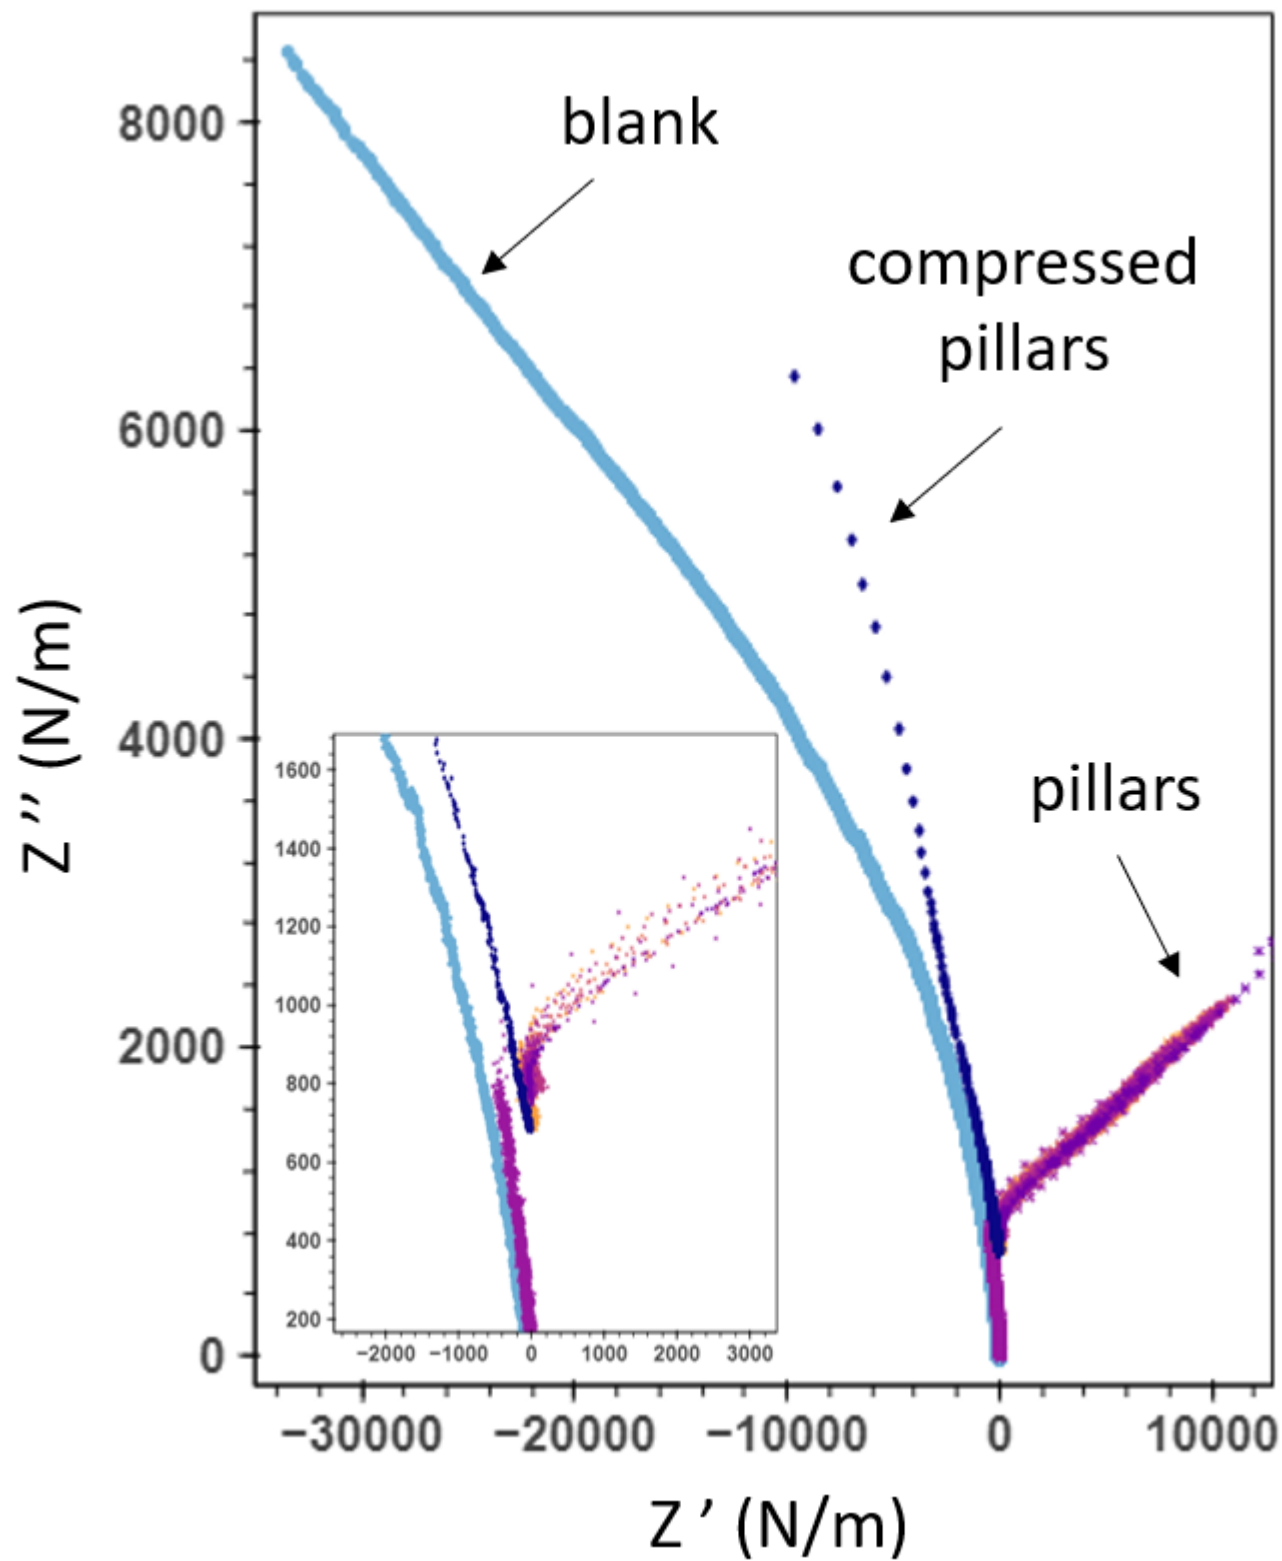

Supplement: d4sm01006j3.pdf [file d4sm01006j3.pdf]
